# Supplementary material for: Synthesis, characterization, antibacterial, antioxidant, DNA binding and SAR study of a novel pyrazine moiety bearing 2-pyrazoline derivatives
Source: Royal Society of Chemistry journal article supplement (doi:10.1039/c4nj00594e), 2014-05-28

## **Supplementary Data**

### **Journal: New Journal of Chemistry**

#### **Synthesis, characterization, antibacterial, antioxidant, DNA binding and SAR study of novel pyrazine moiety bearing 2-pyrazoline derivatives**

Bheru Singh Kitawat<sup>a</sup> and Man Singh<sup>\*a</sup>

<sup>a</sup>School of Chemical Sciences, Central University of Gujarat, Gandhinagar-382030 (India)

E-mail: mansingh50@hotmail.com, Tel.: +91-079-232-60210; fax: +91-079-232-60076

1. <sup>1</sup>H NMR and <sup>13</sup>C NMR spectra of compounds **4a-4l**.

Figure S1: <sup>1</sup>H NMR spectra of 4a

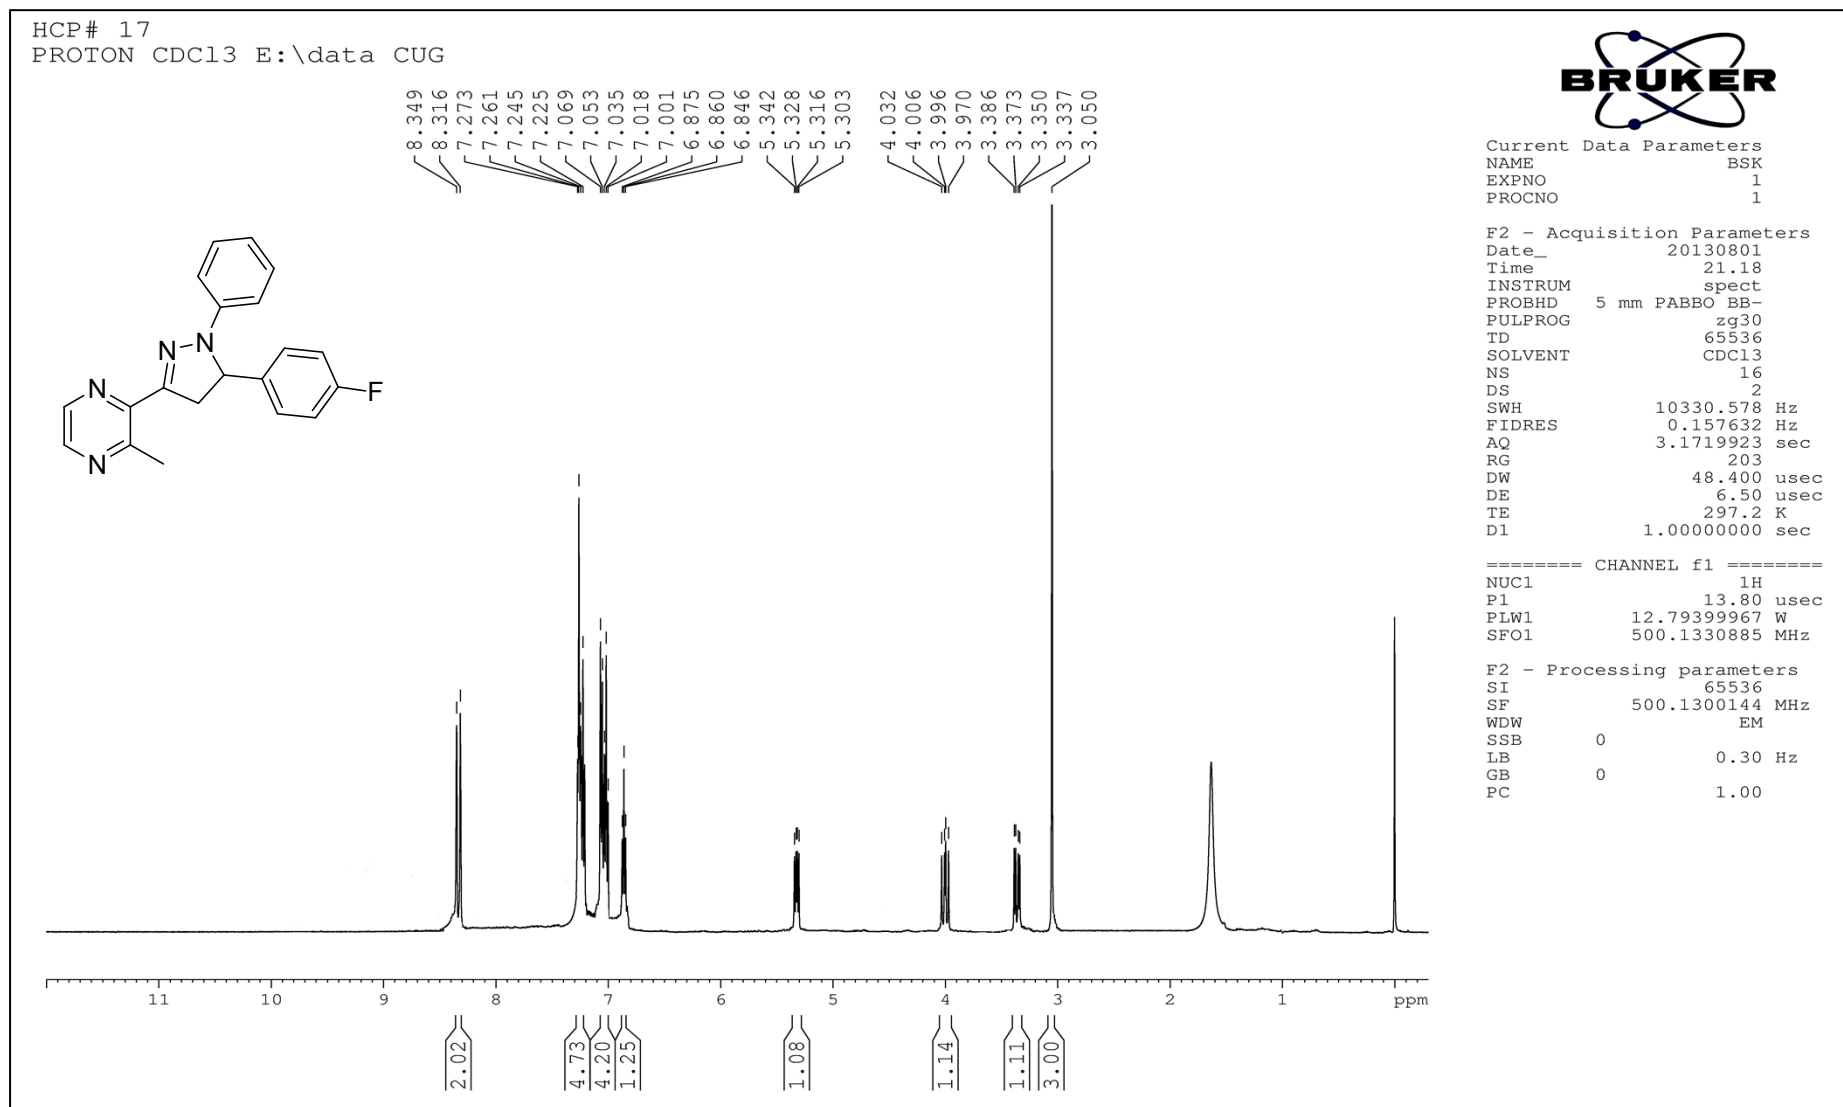

Figure S2: <sup>13</sup>C NMR spectra of 4a

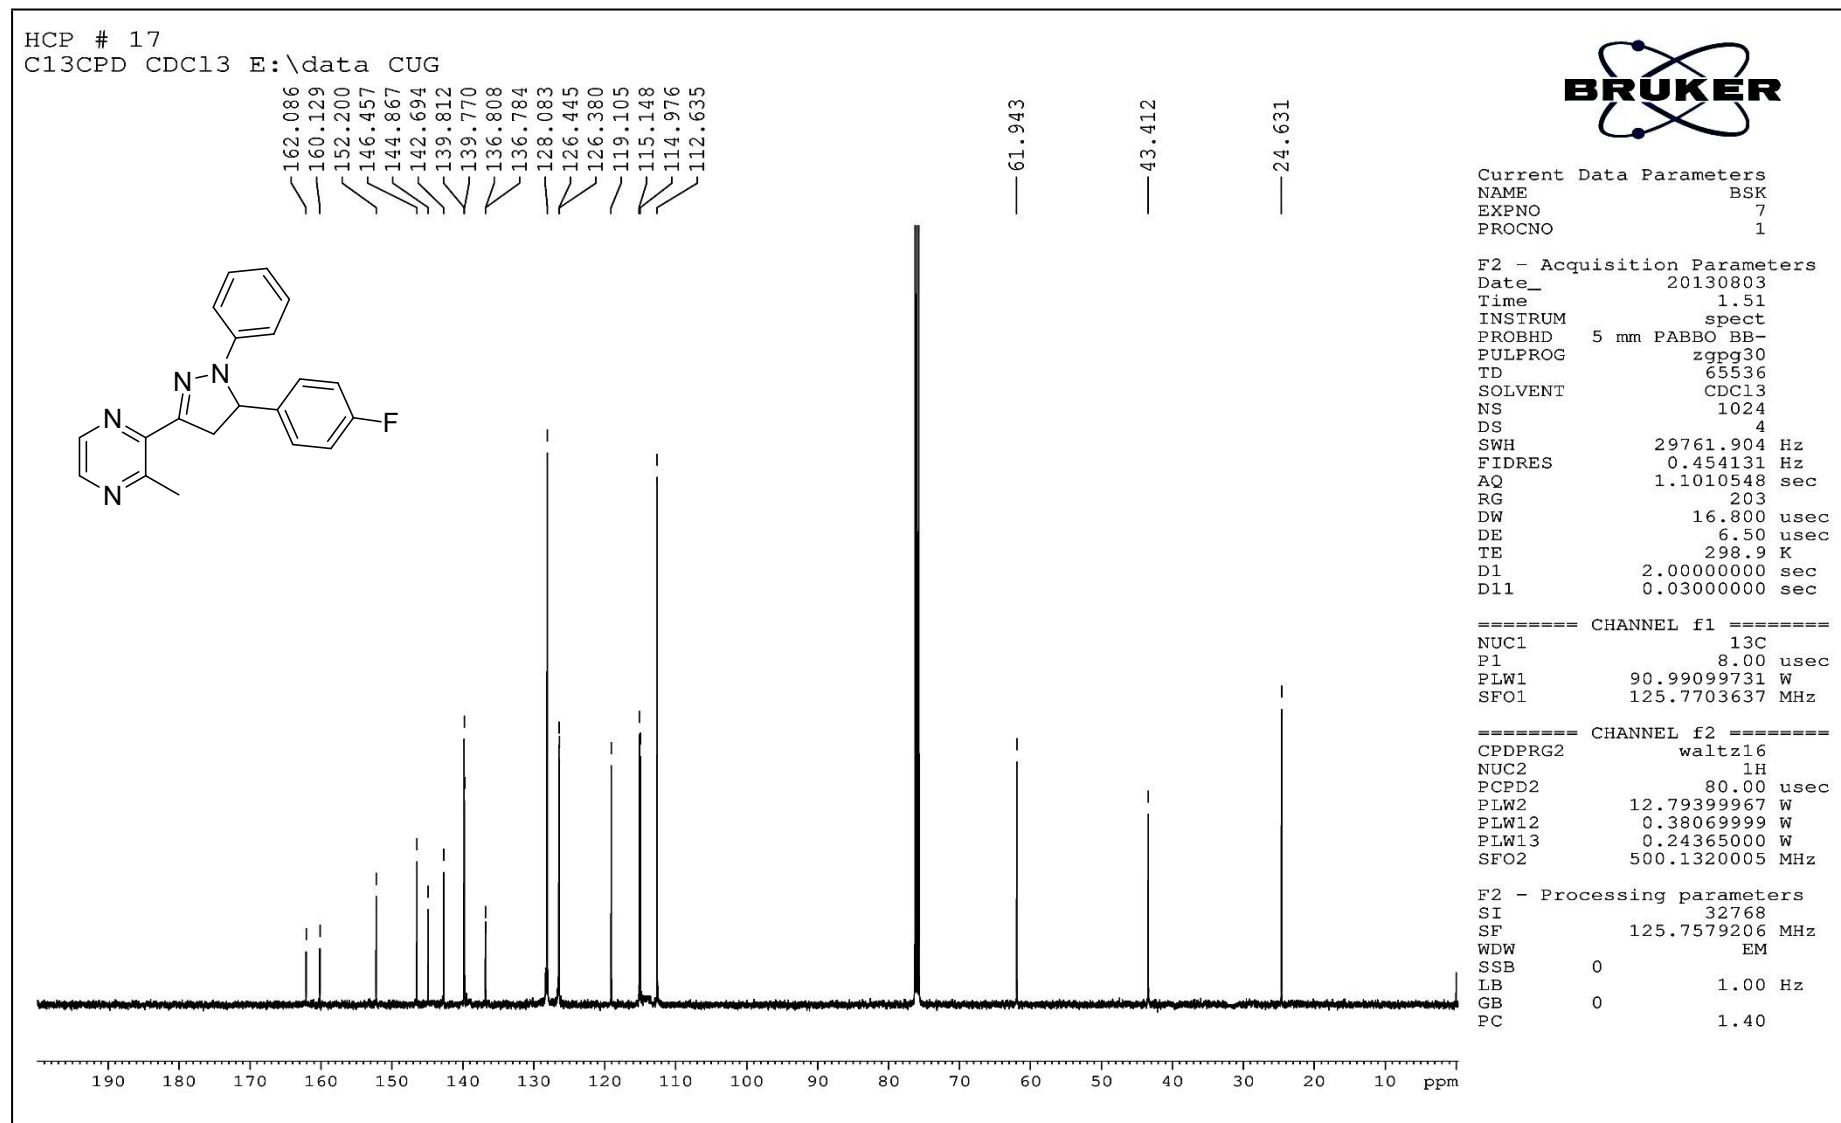

Figure S3: <sup>1</sup>H NMR spectra of 4b

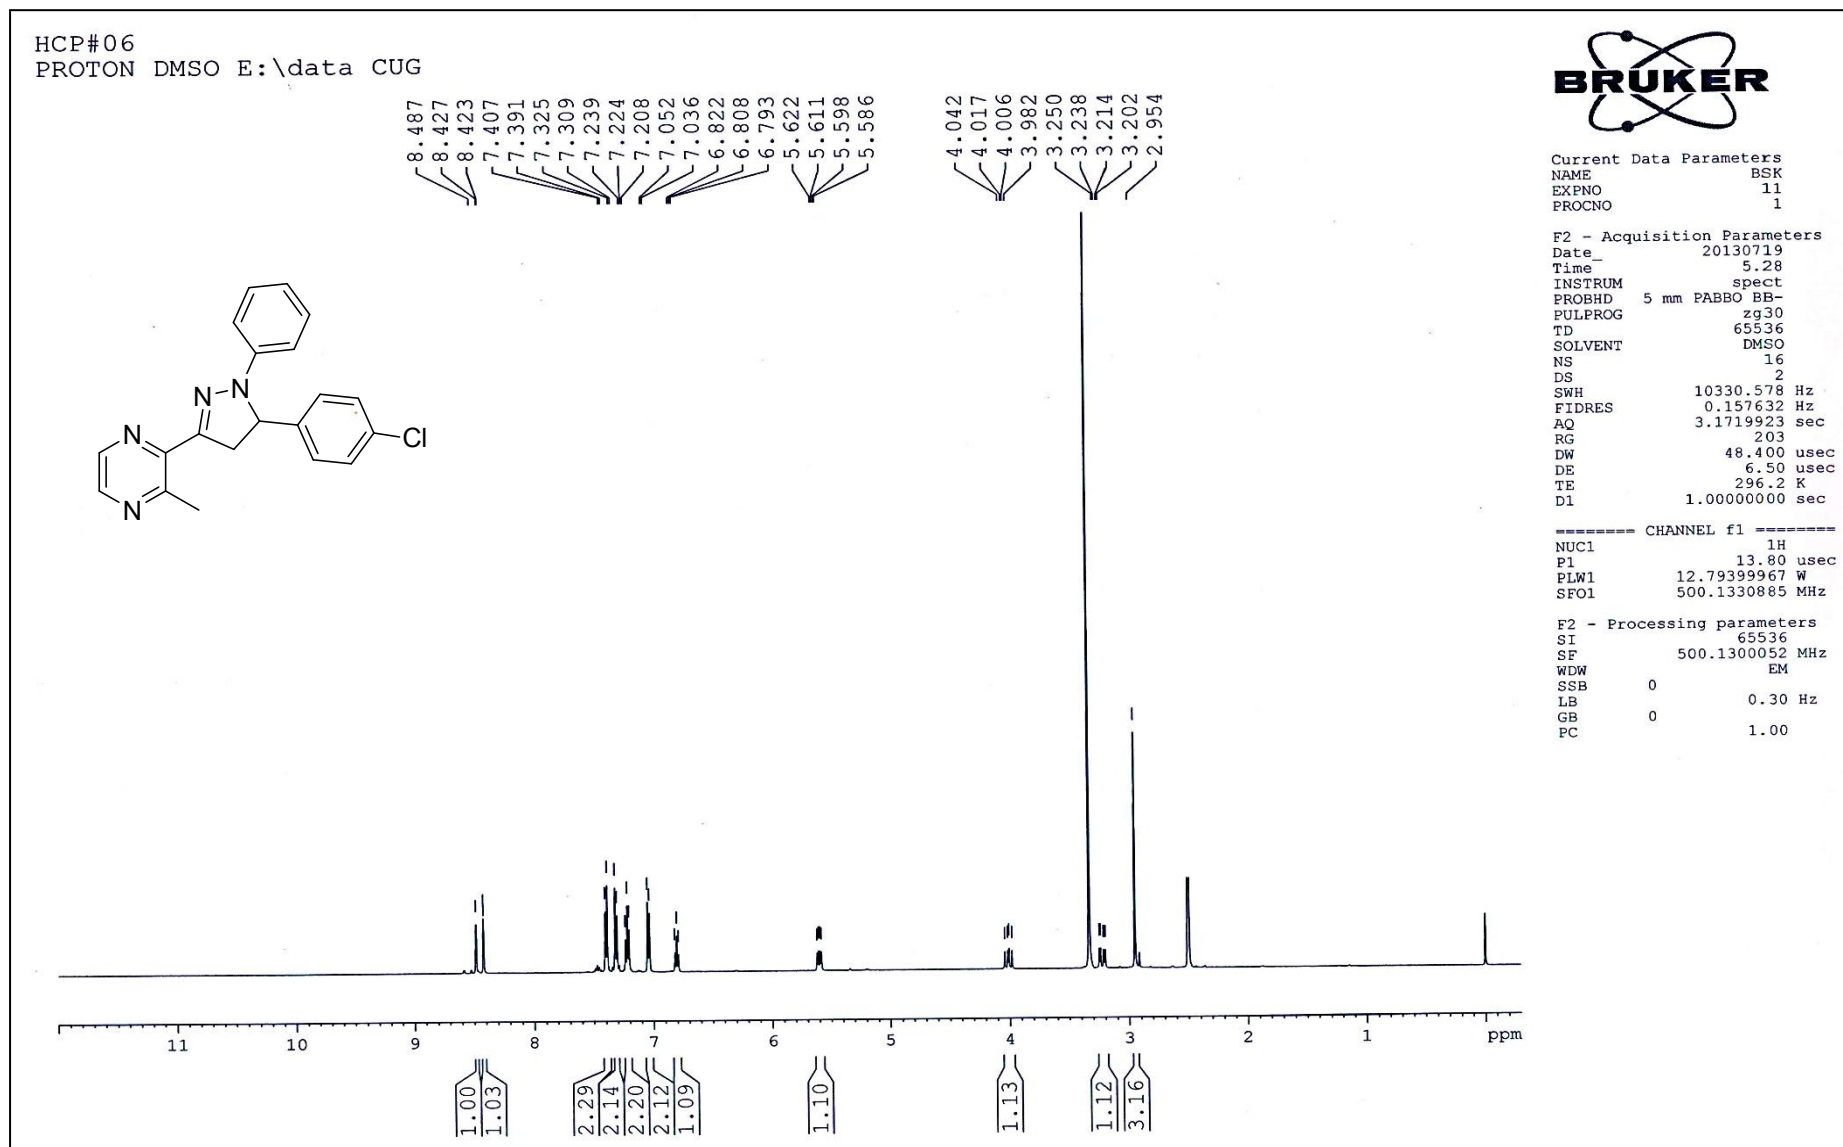



Figure S4: <sup>13</sup>C NMR spectra of 4b

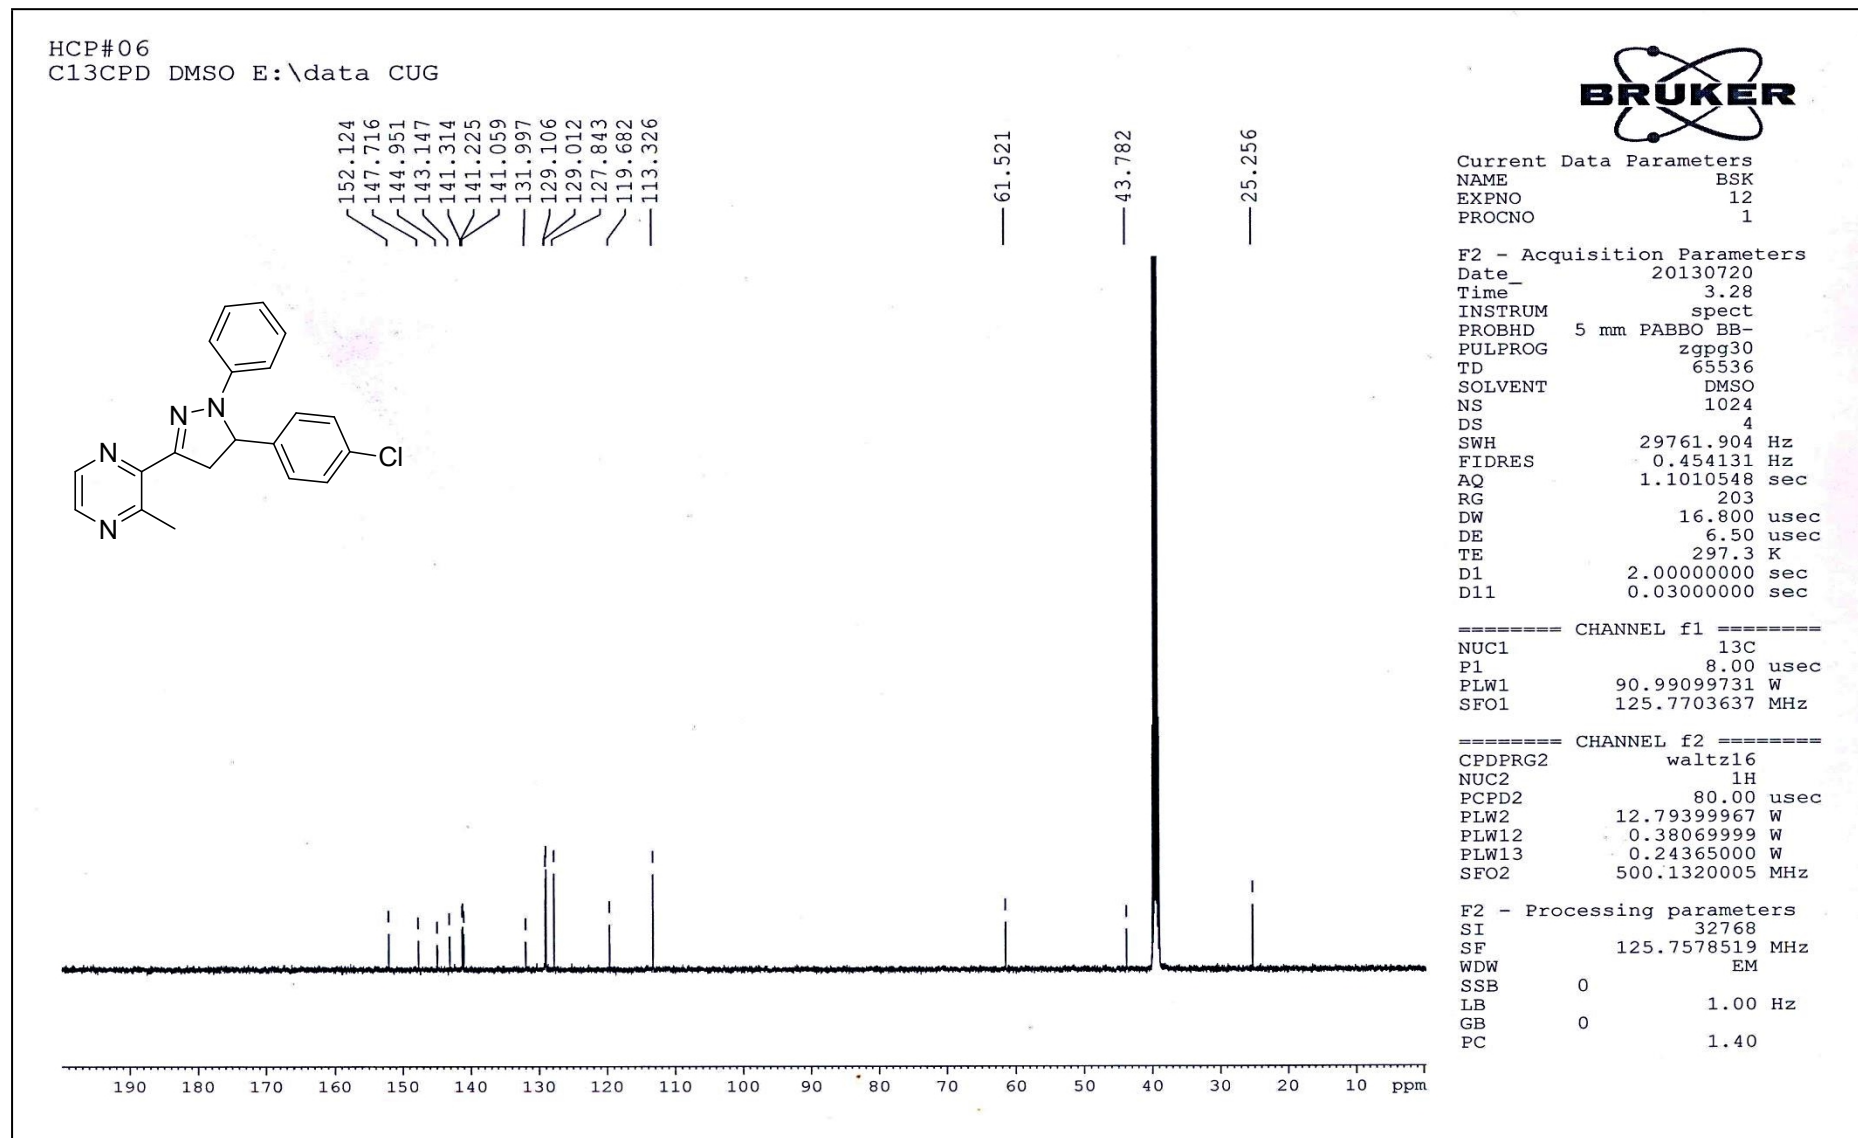

Figure S5: <sup>1</sup>H NMR spectra of 4c

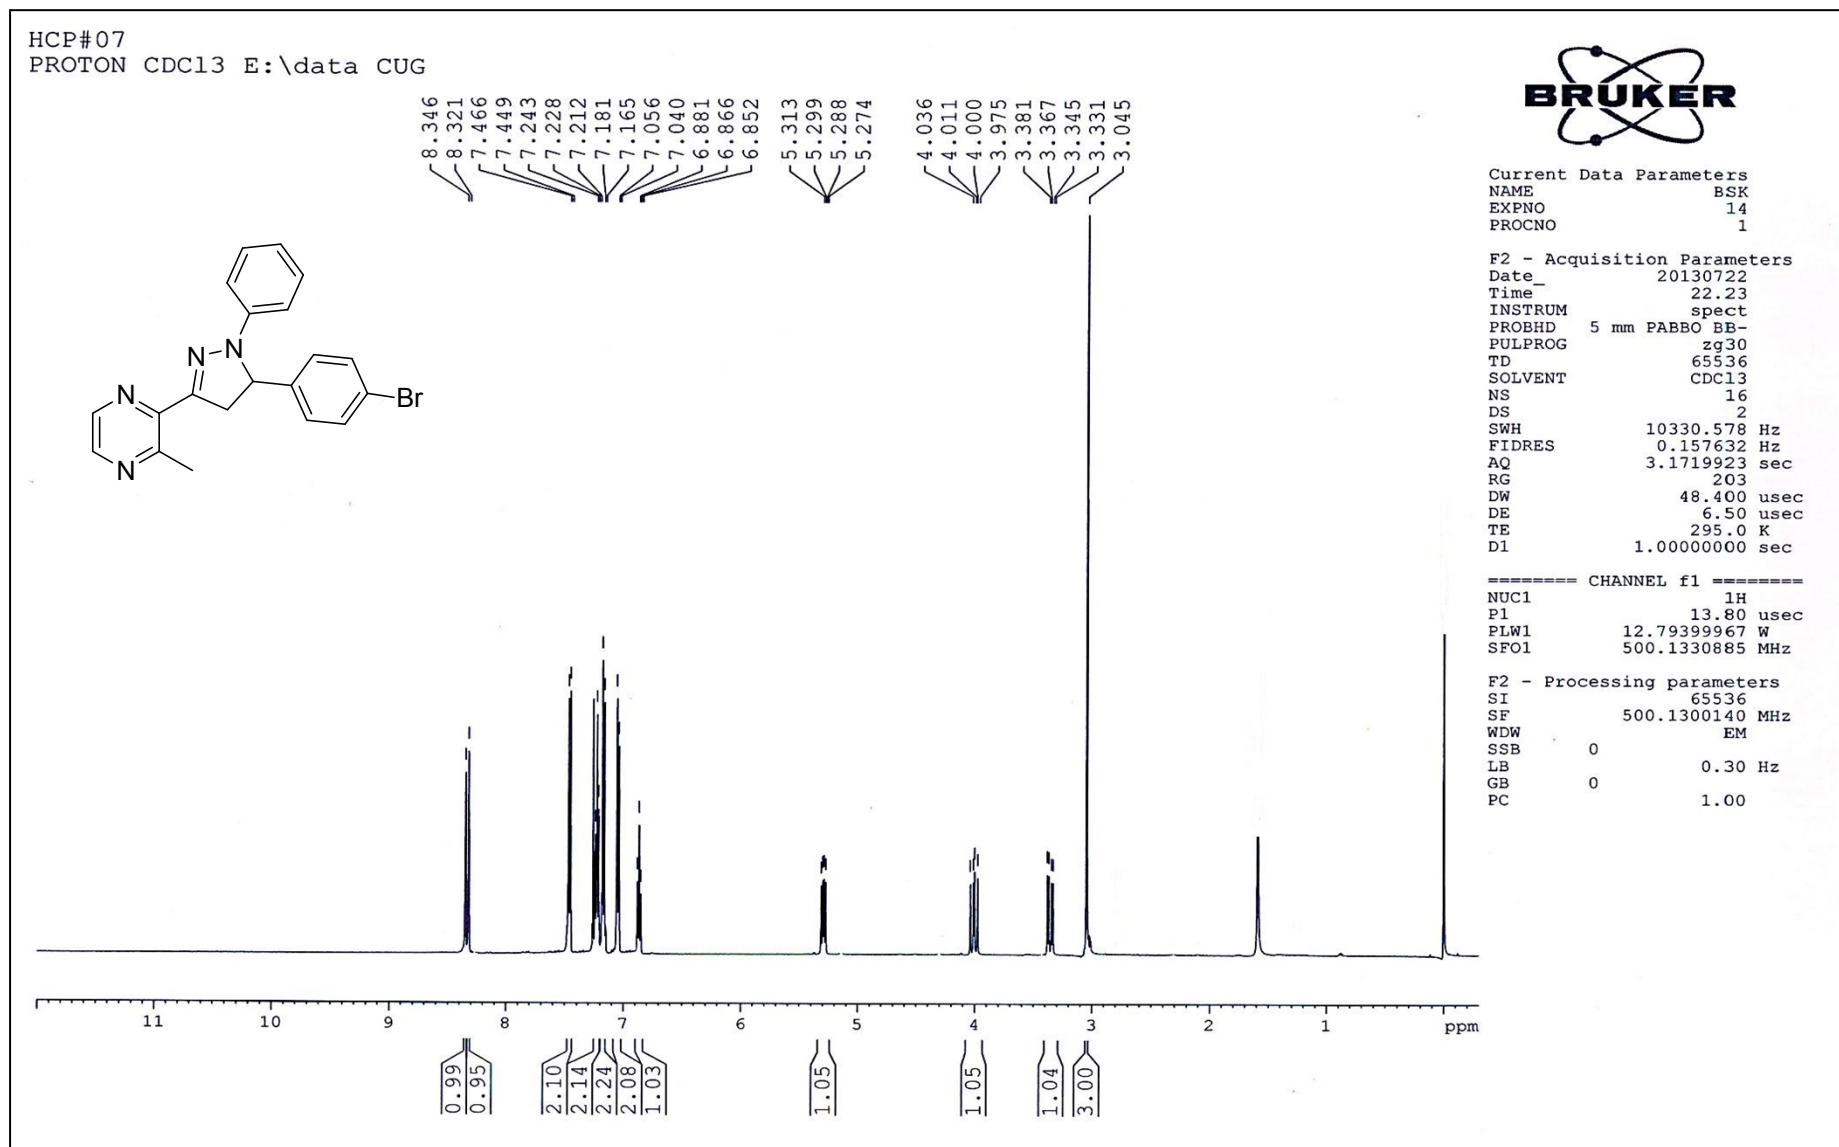

Figure S6: <sup>13</sup>C NMR spectra of 4c

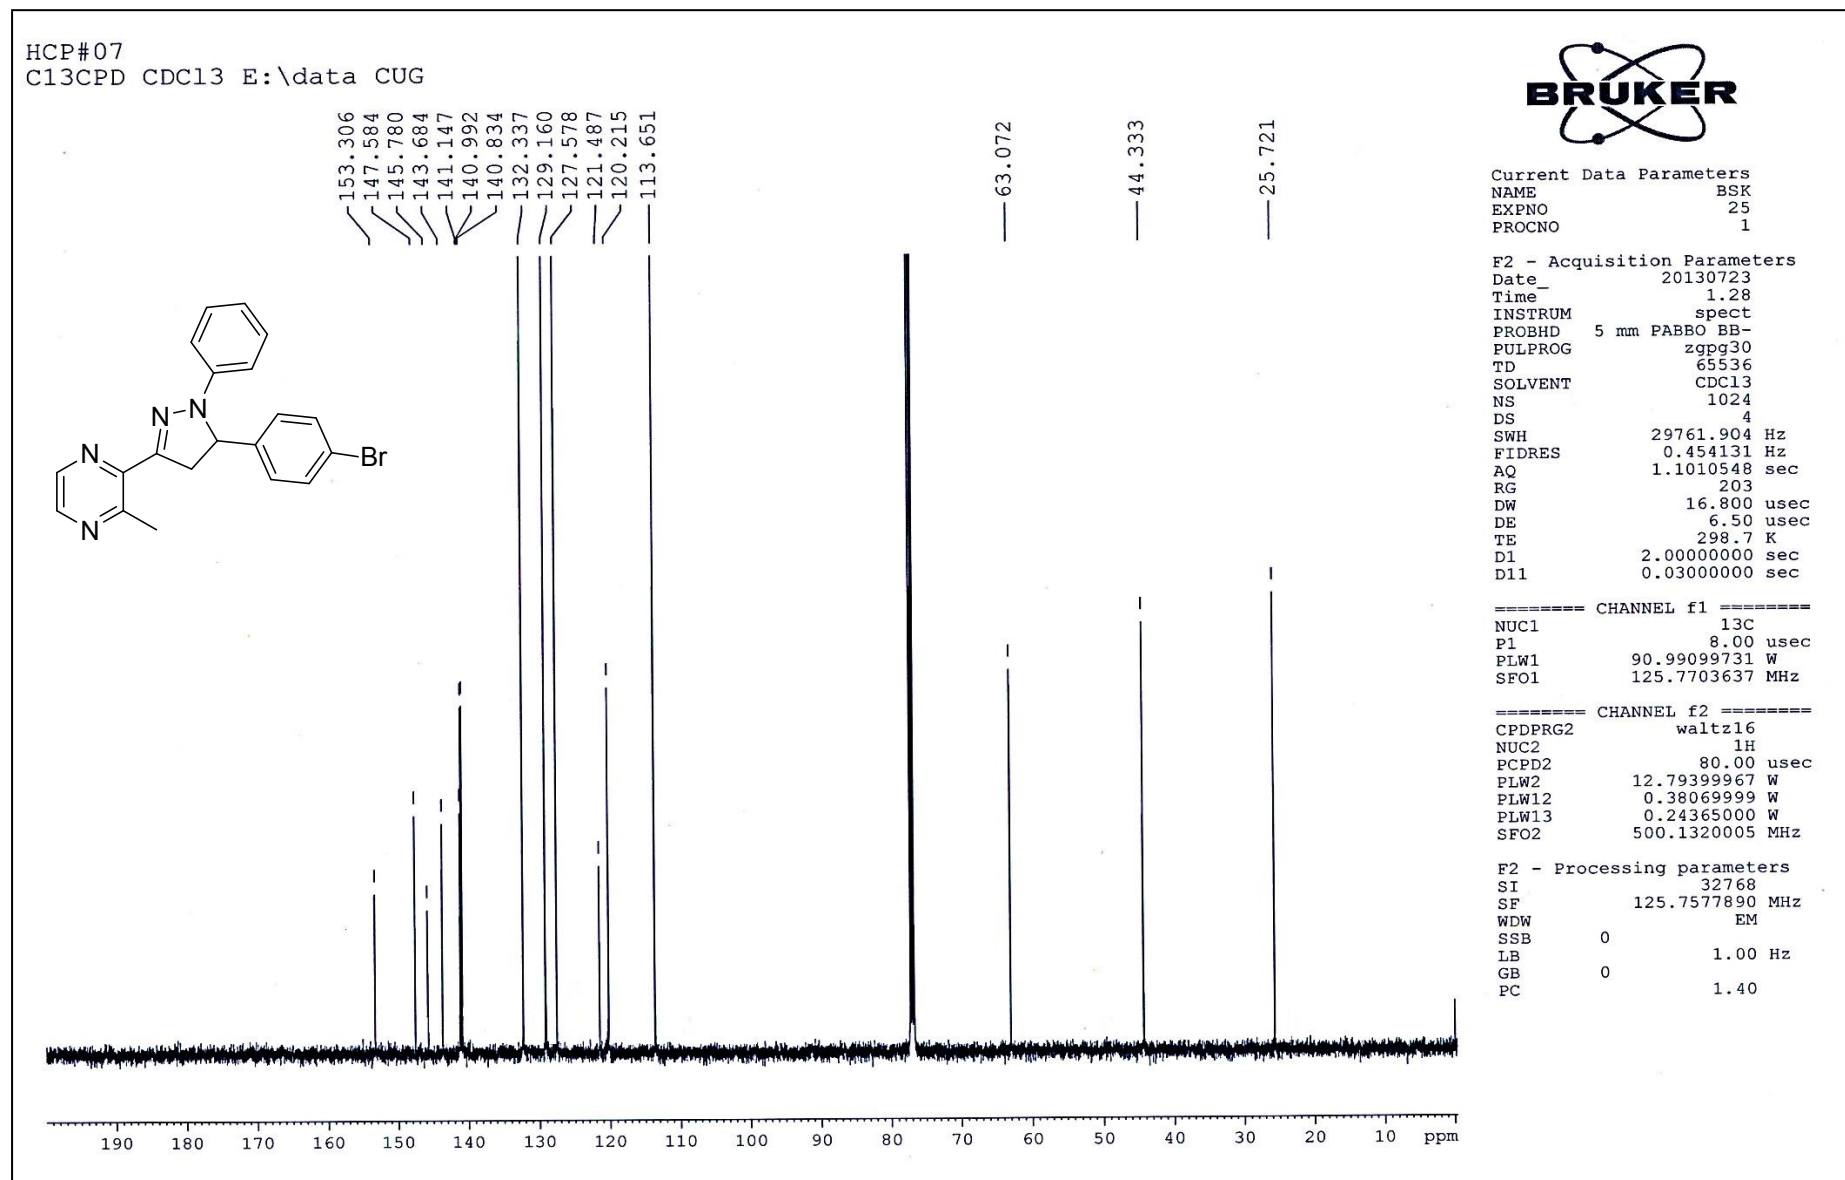

Figure S7: <sup>1</sup>H NMR spectra of 4d

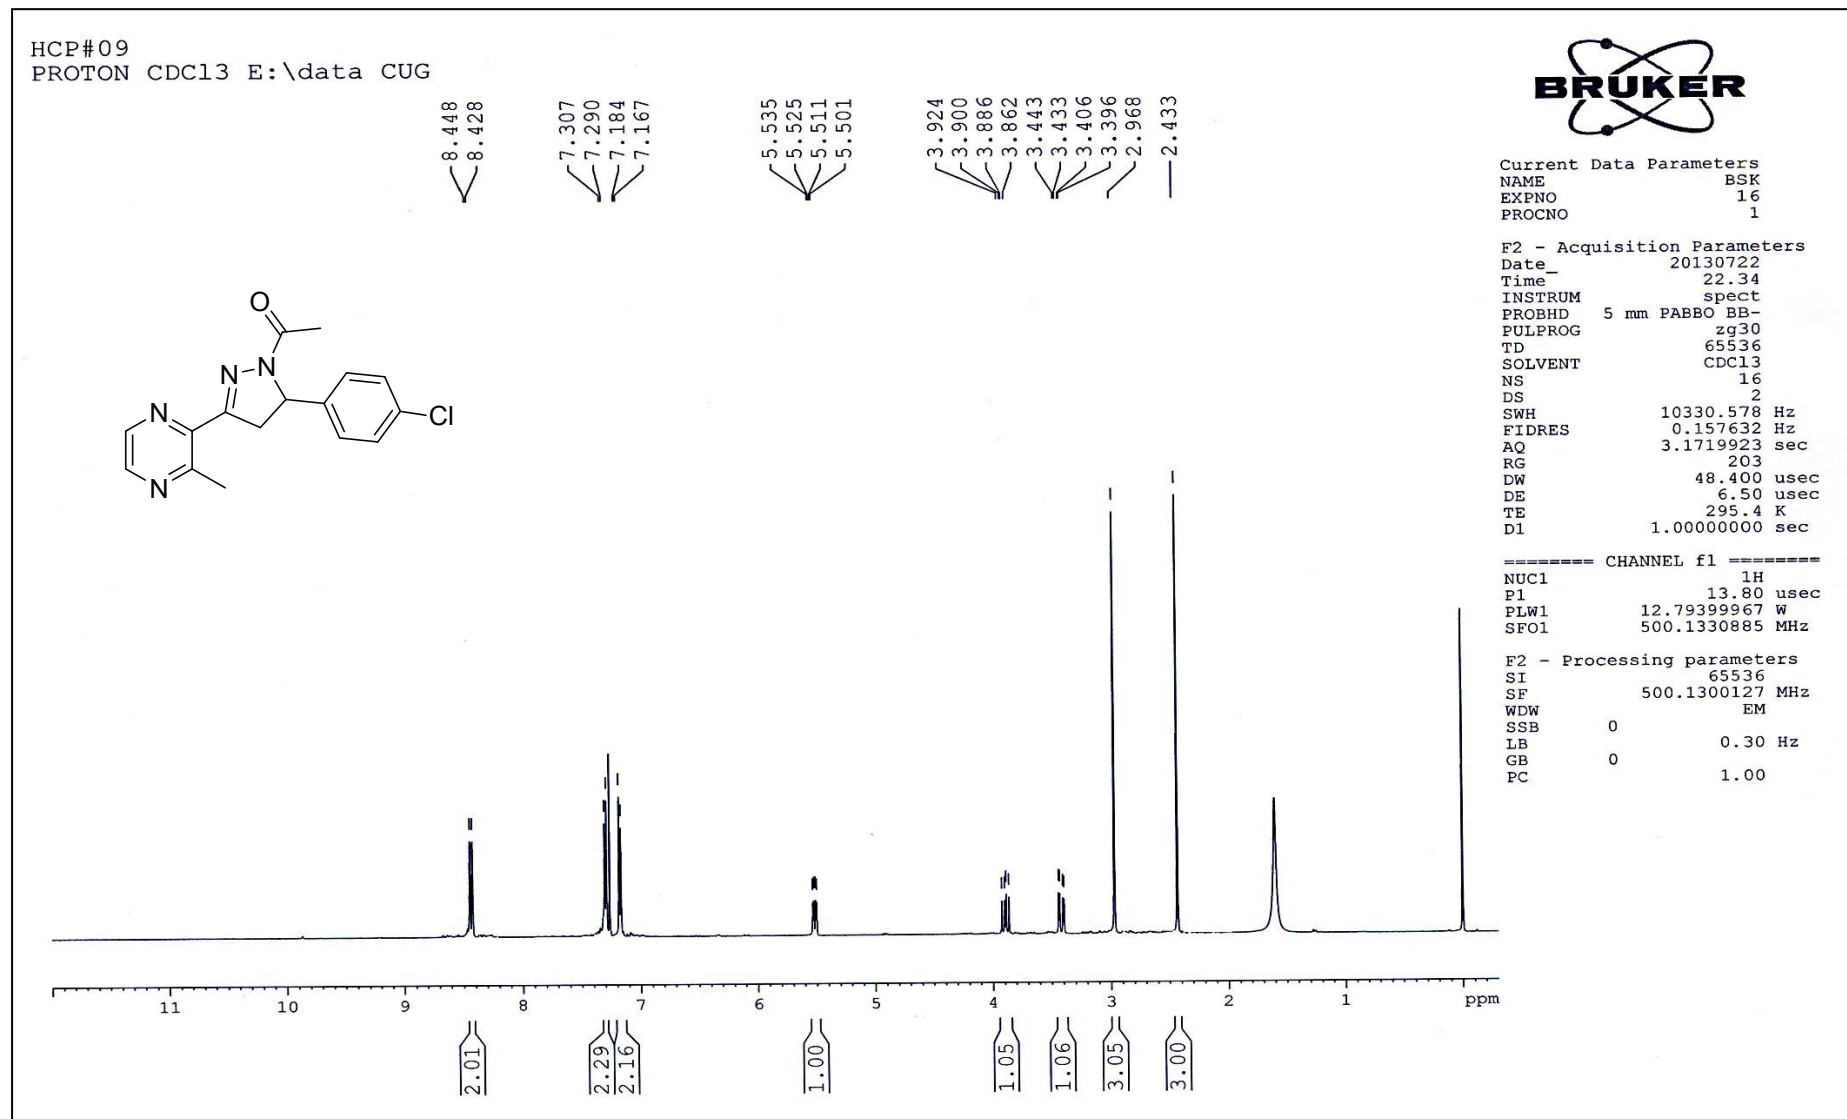

Figure S8: <sup>13</sup>C NMR spectra of 4d

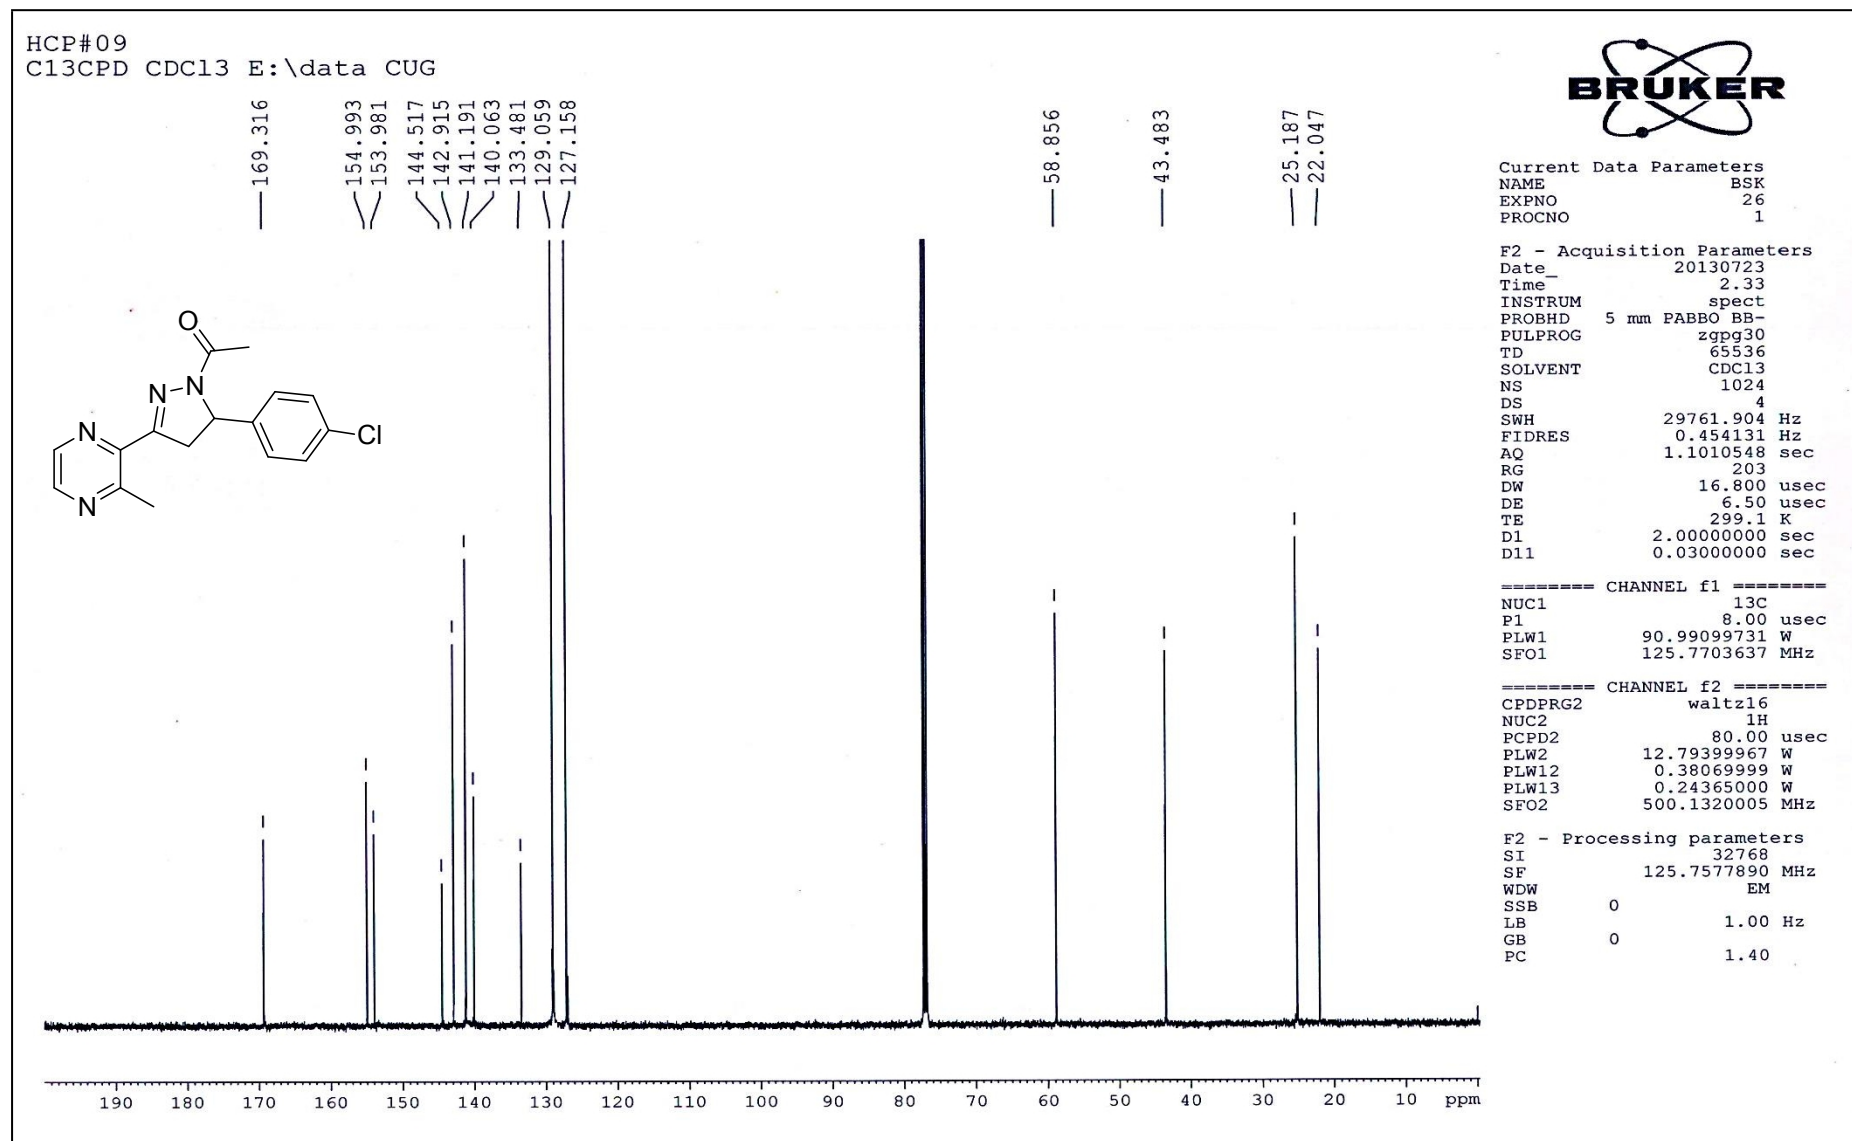

Figure S9: <sup>1</sup>H NMR spectra of 4e

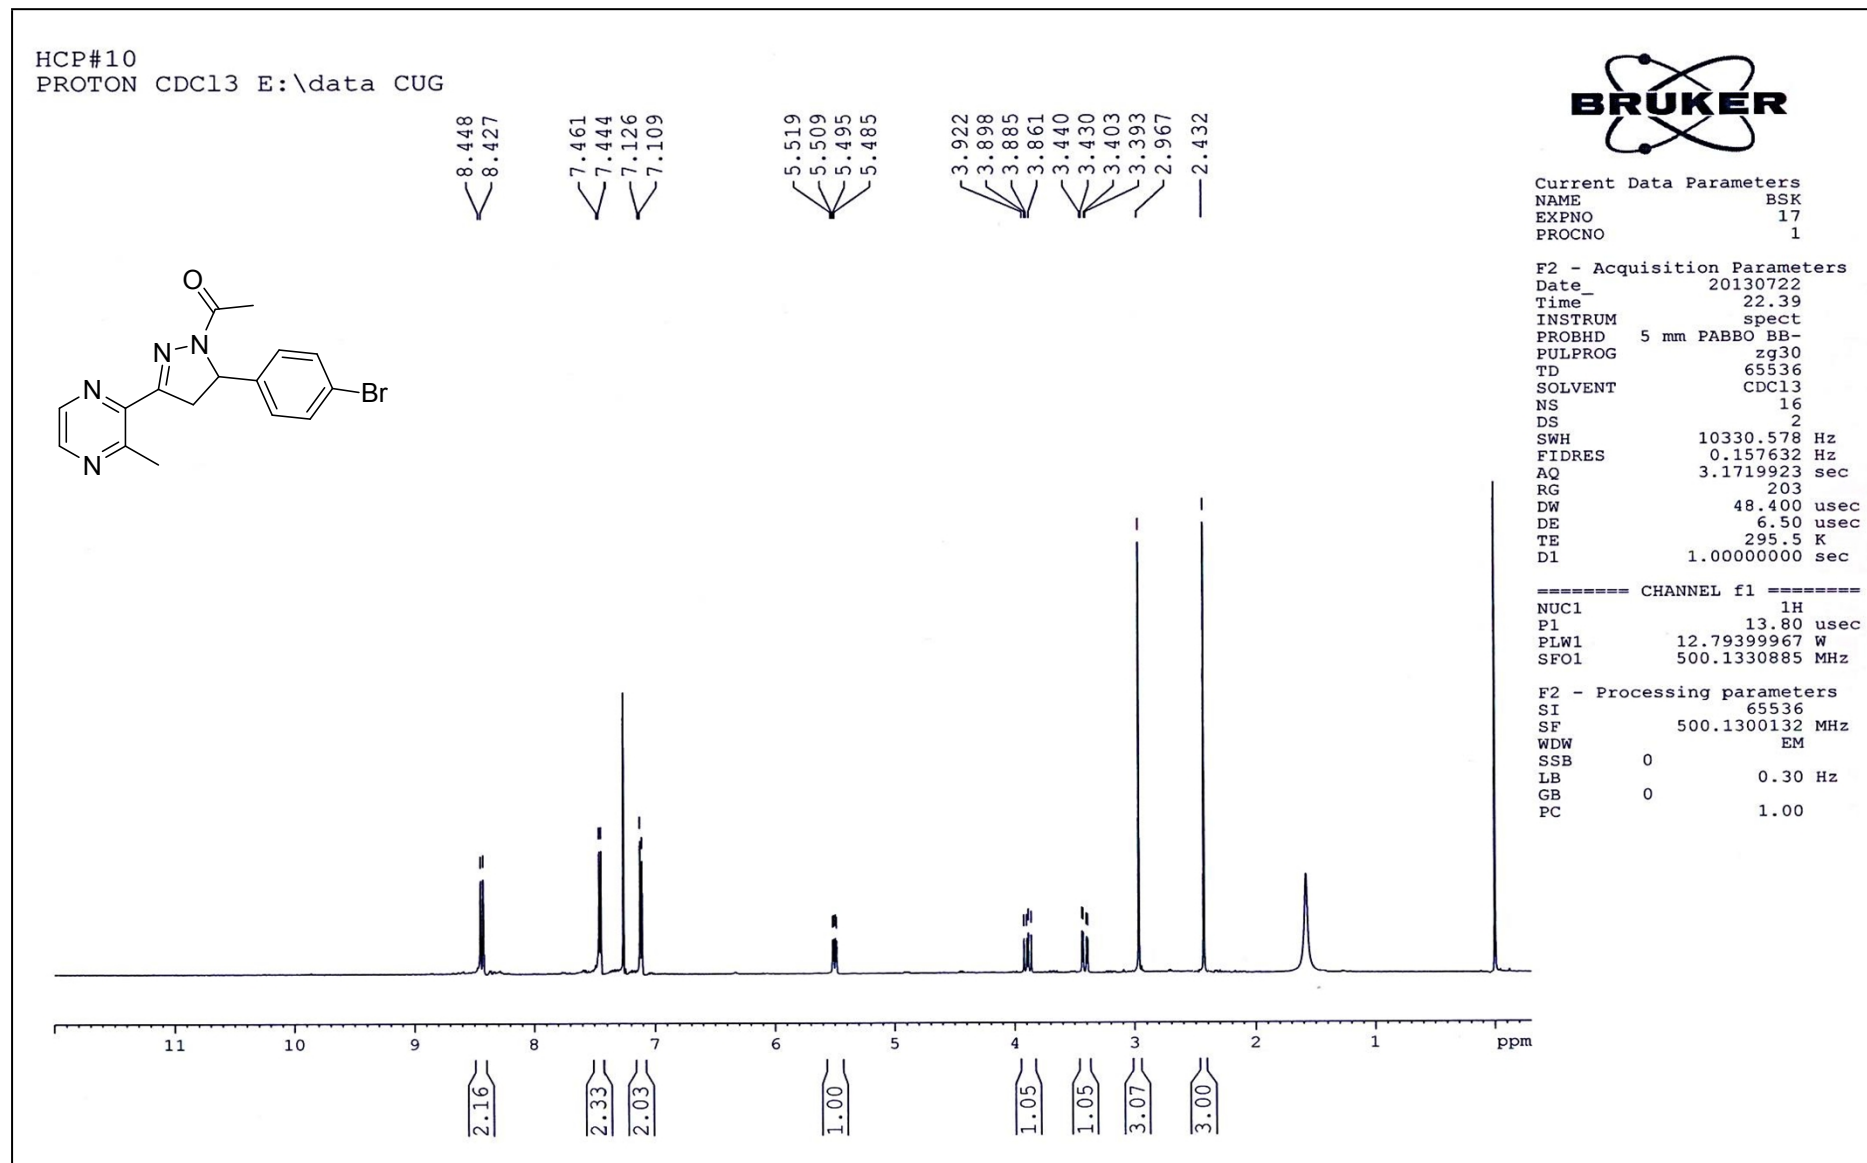

Figure S10:  $^{13}\text{C}$  NMR spectra of 4e

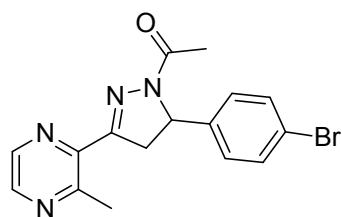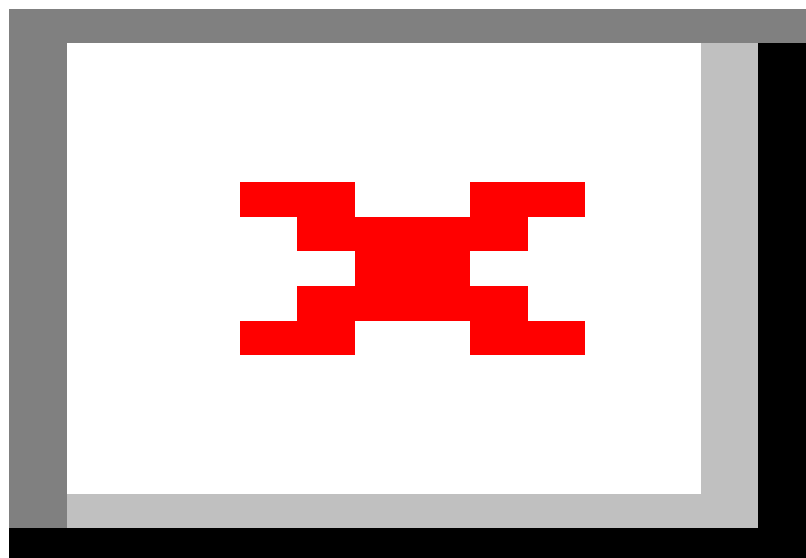



Figure S11: <sup>1</sup>H NMR spectra of 4f

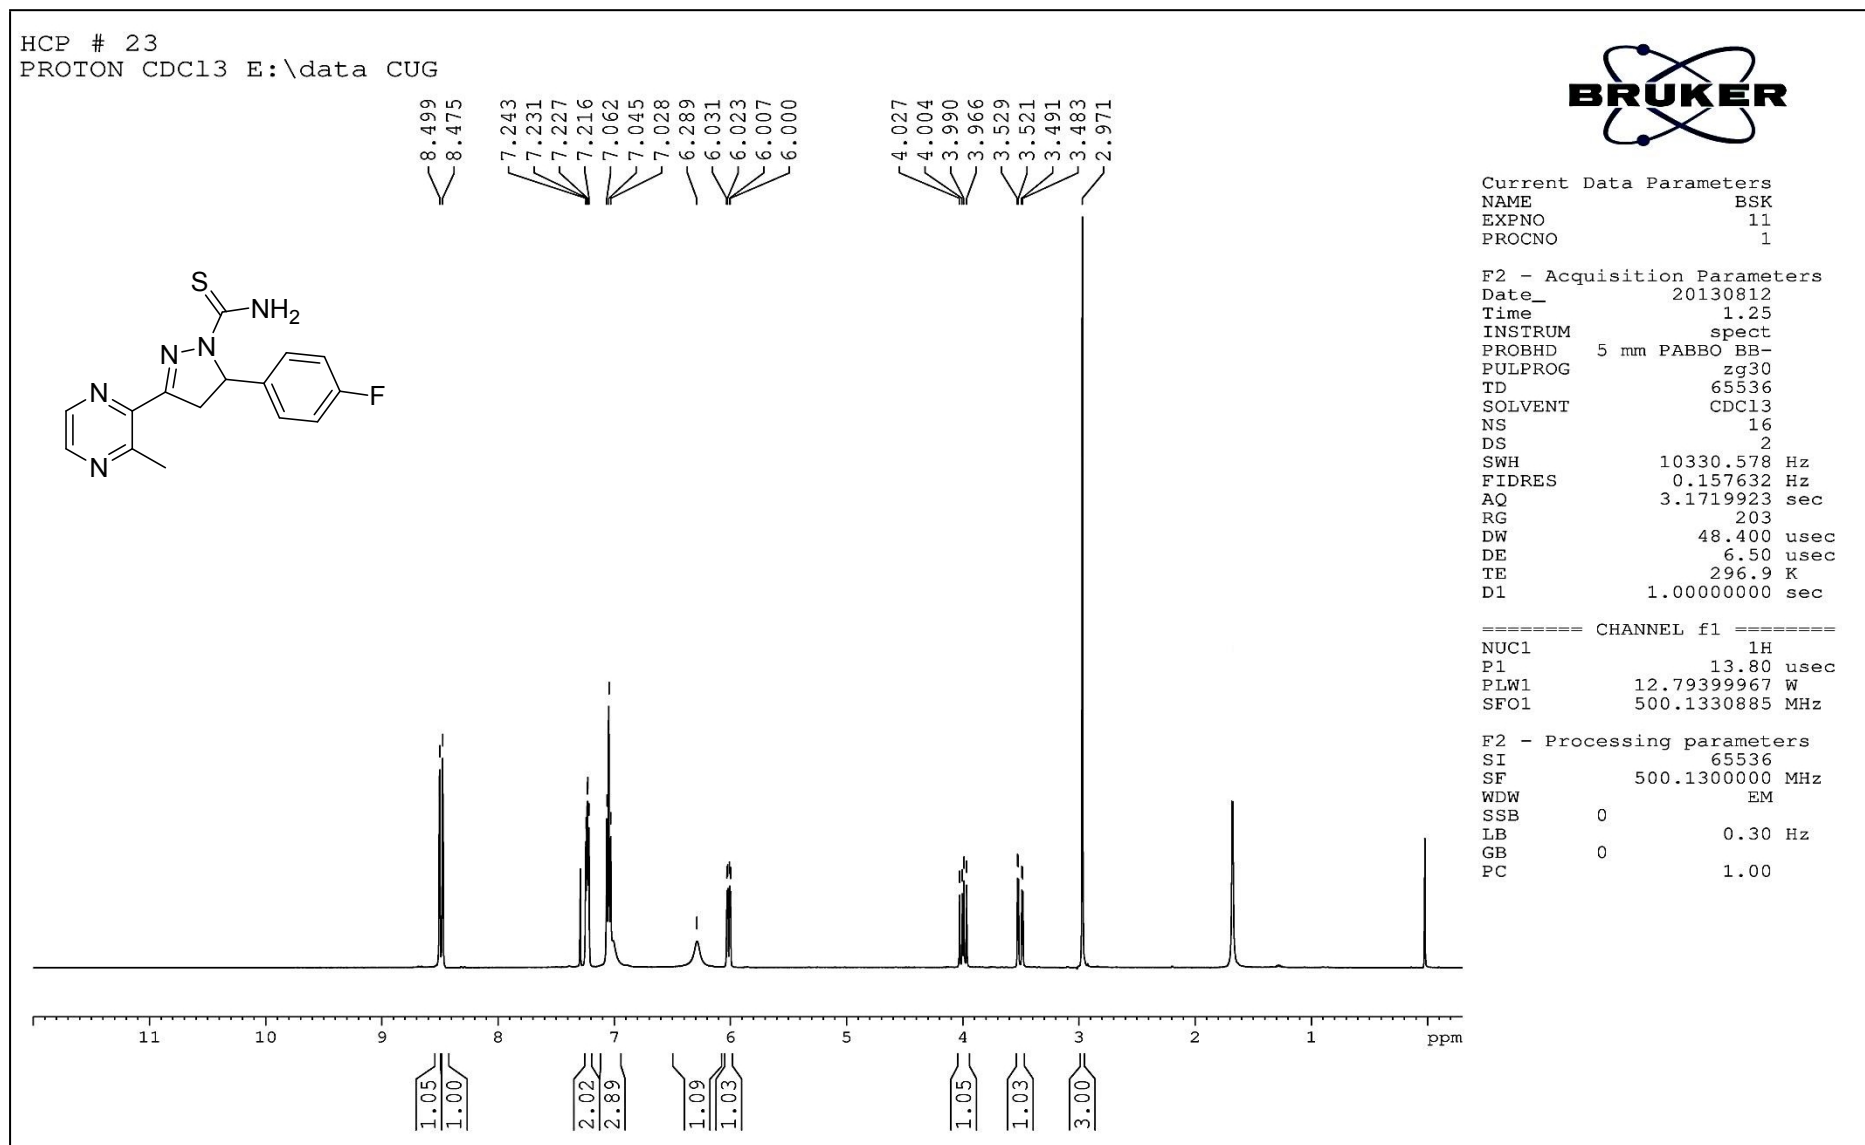



Figure S12: <sup>13</sup>C NMR spectra of 4f

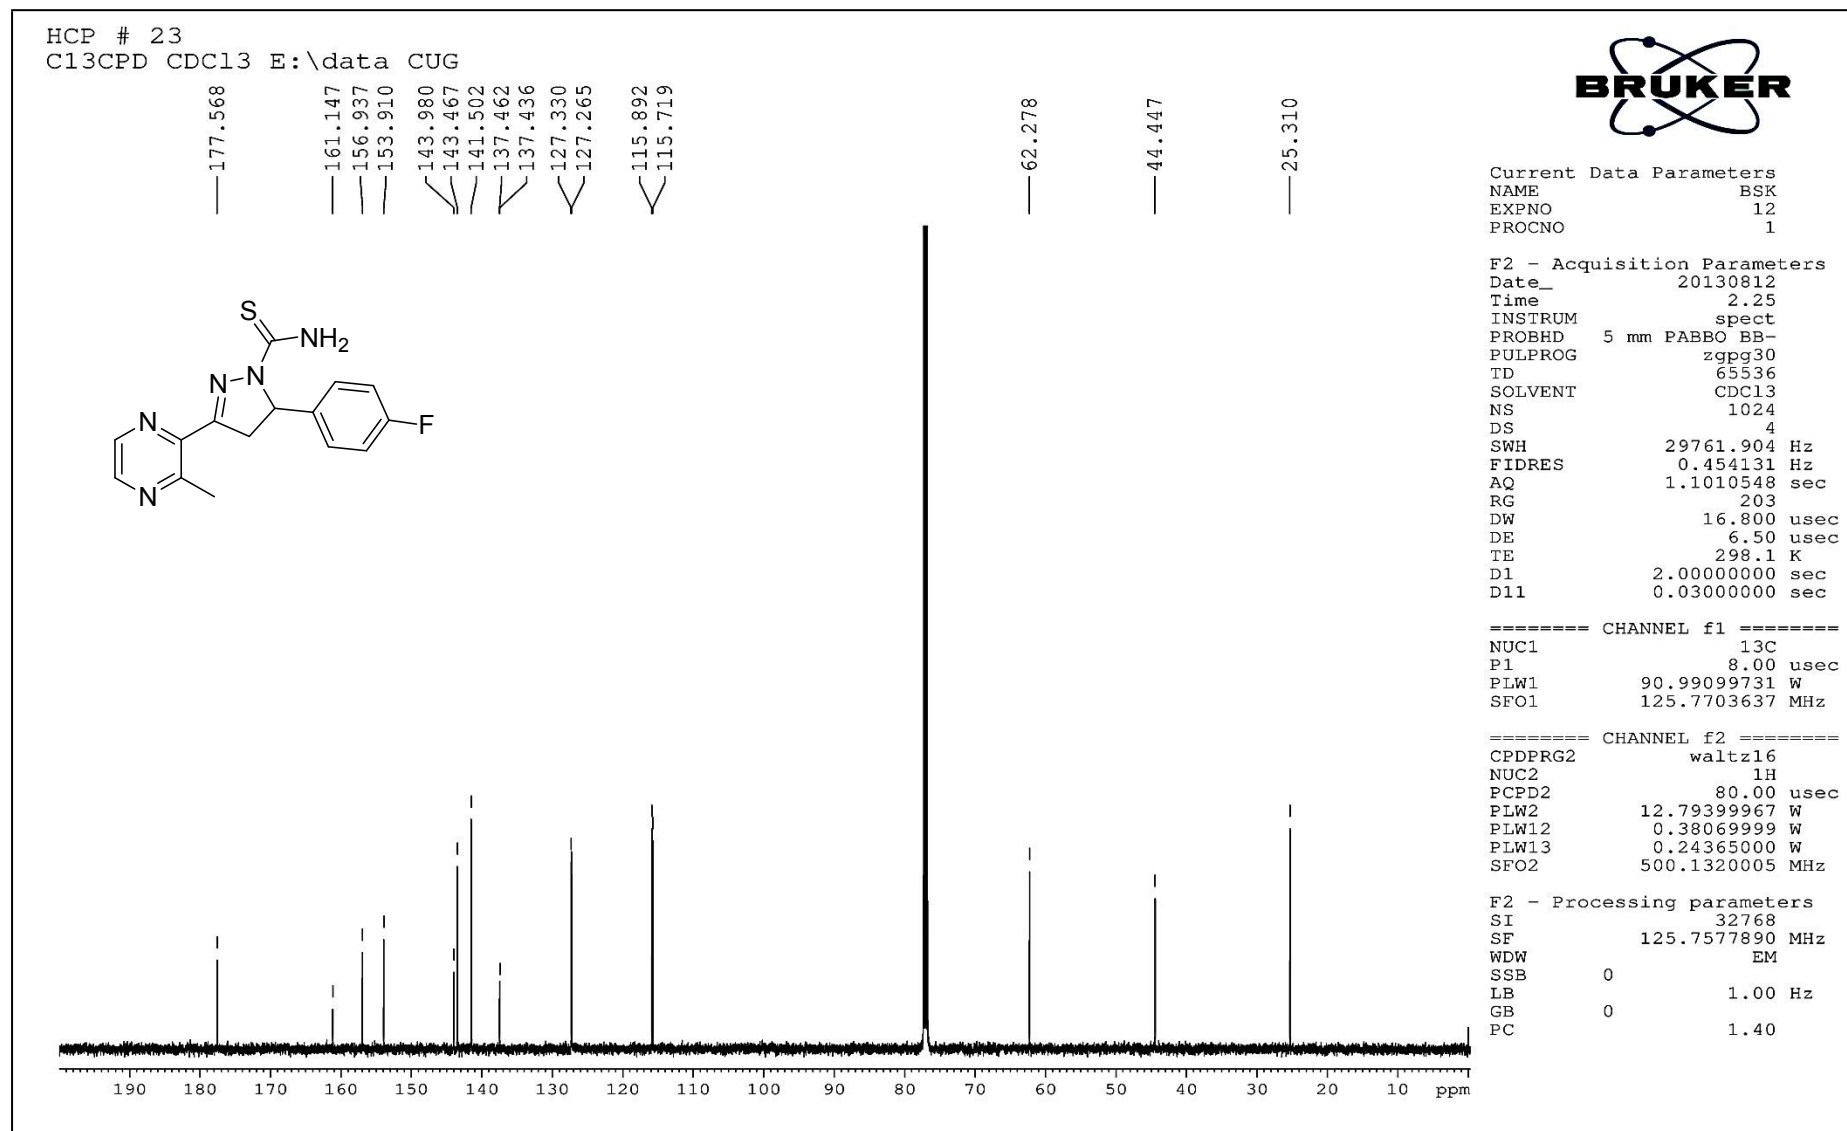

Figure S13: <sup>1</sup>H NMR spectra of 4g

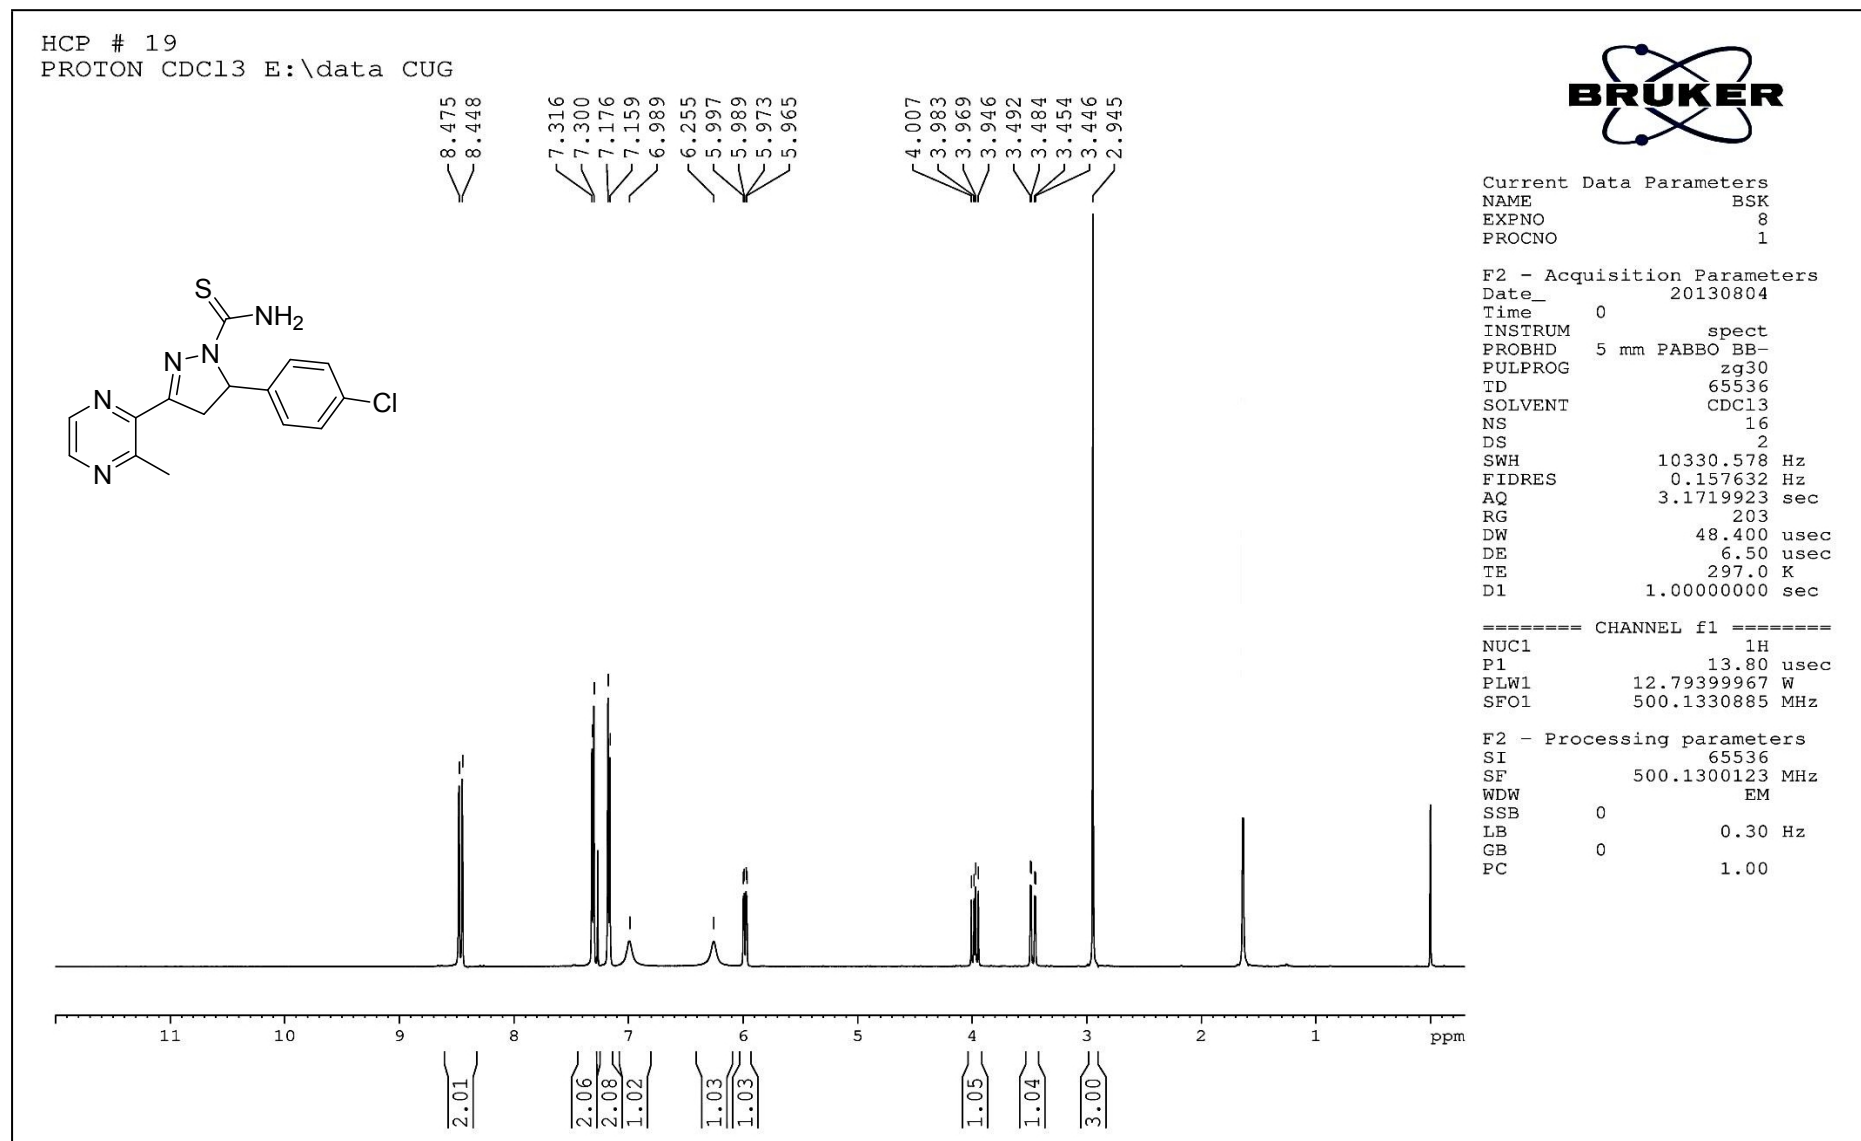

Figure S14: <sup>13</sup>C NMR spectra of 4g

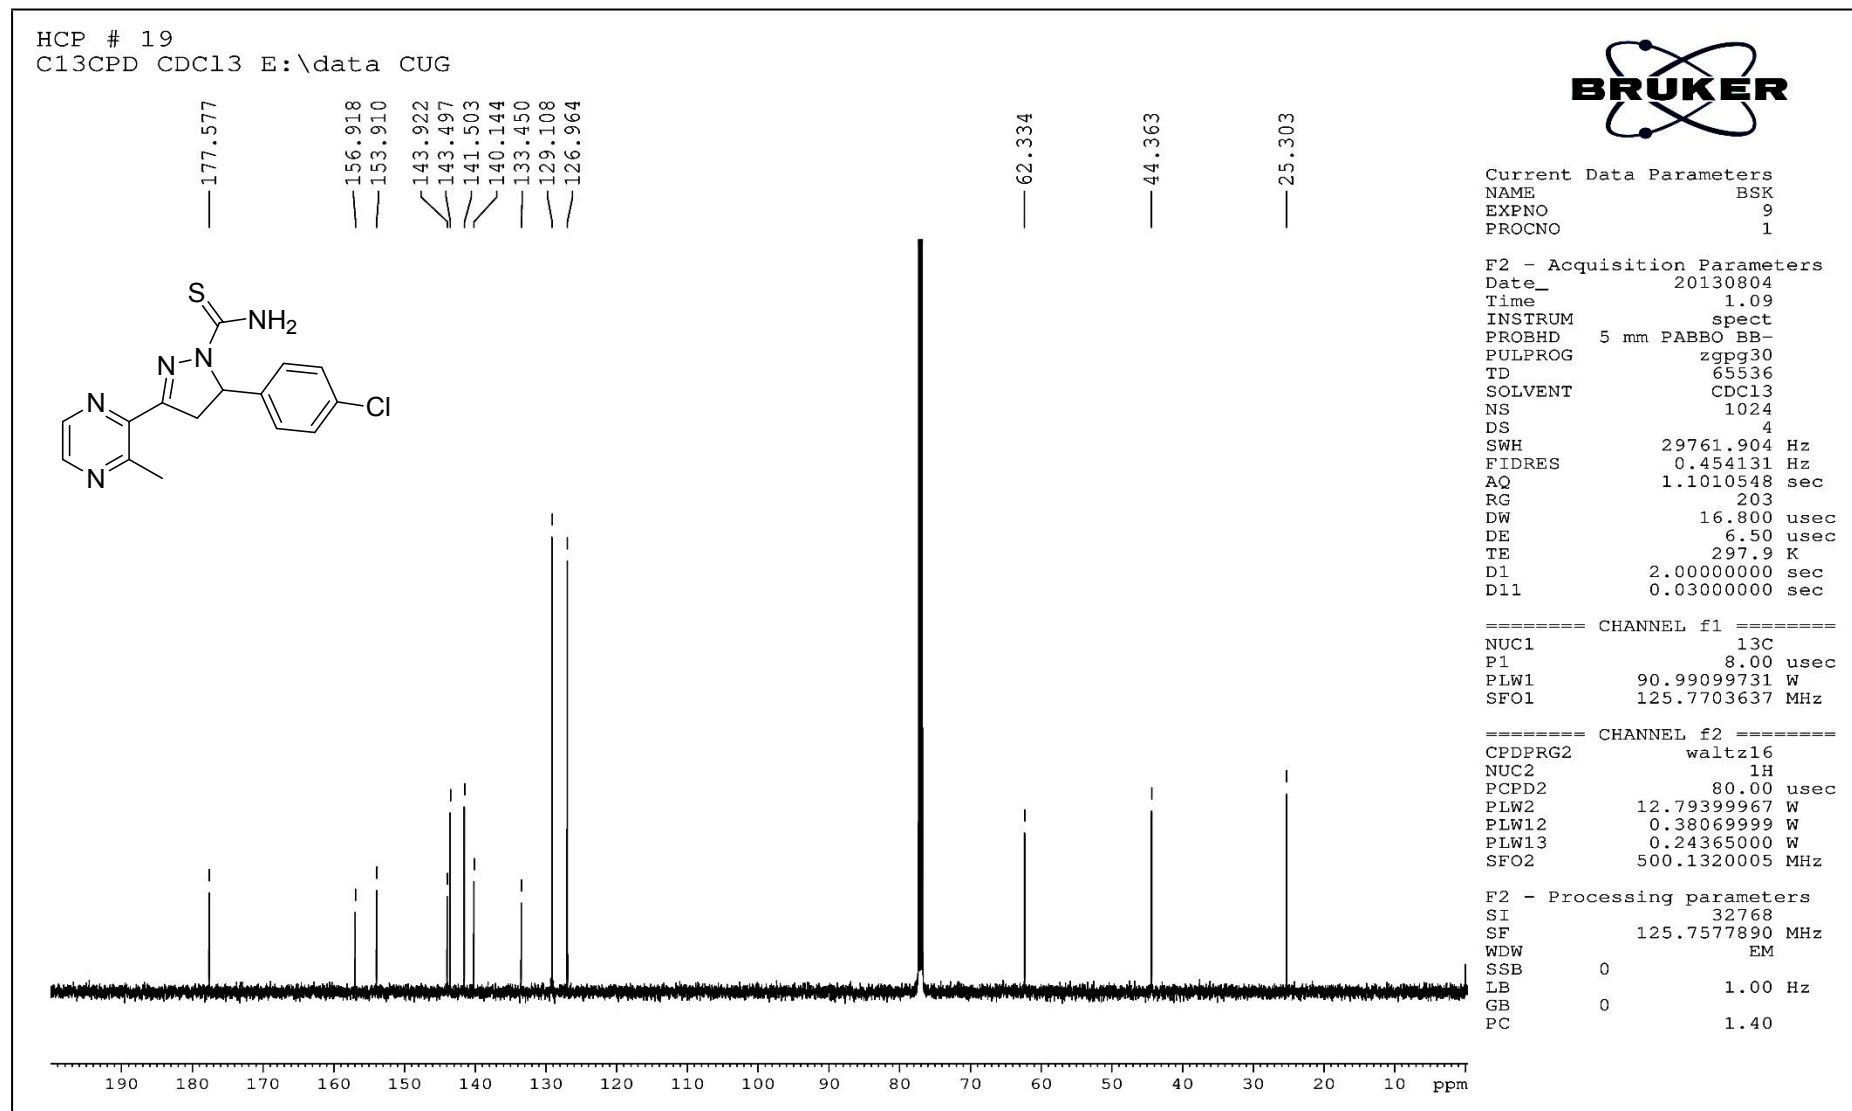

Figure S15: <sup>1</sup>H NMR spectra of 4h

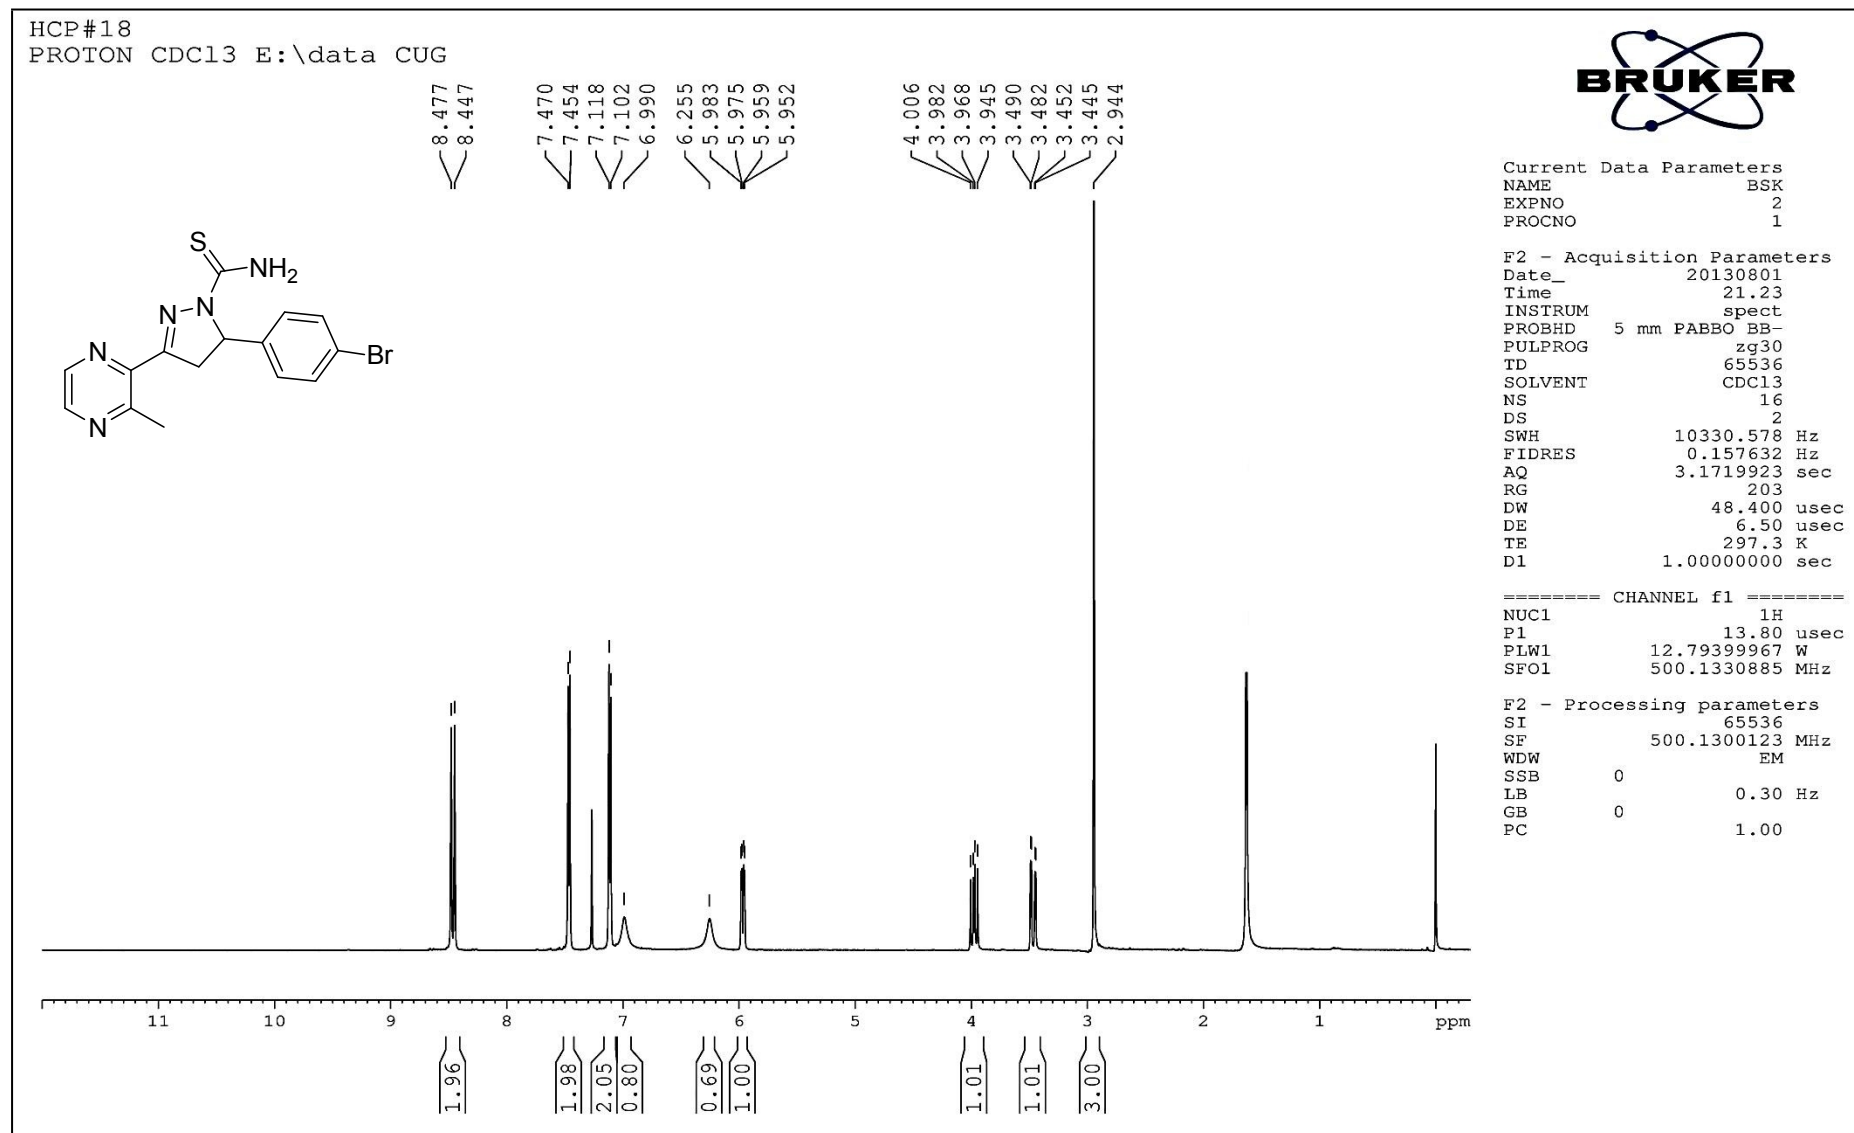

Figure S16: <sup>13</sup>C NMR spectra of 4h

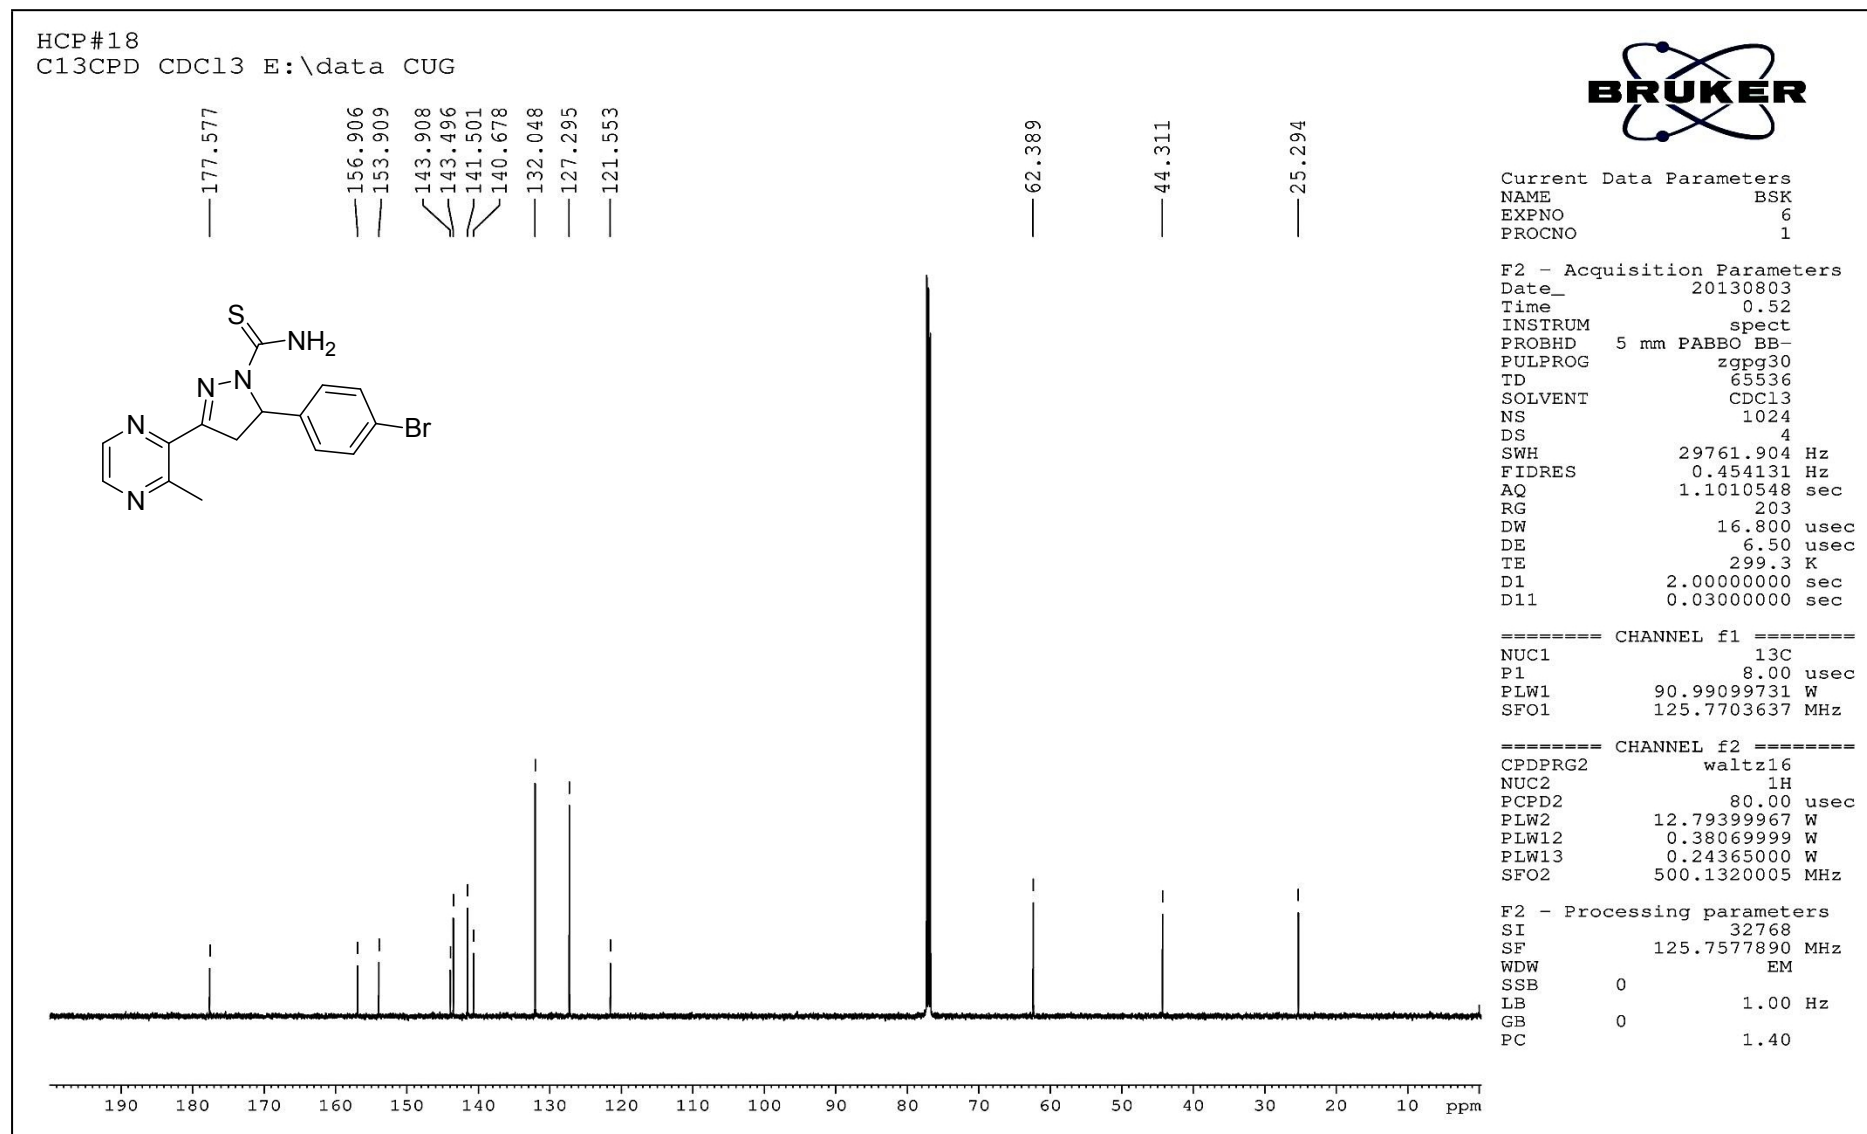

Figure S17: <sup>1</sup>H NMR spectra of 4i

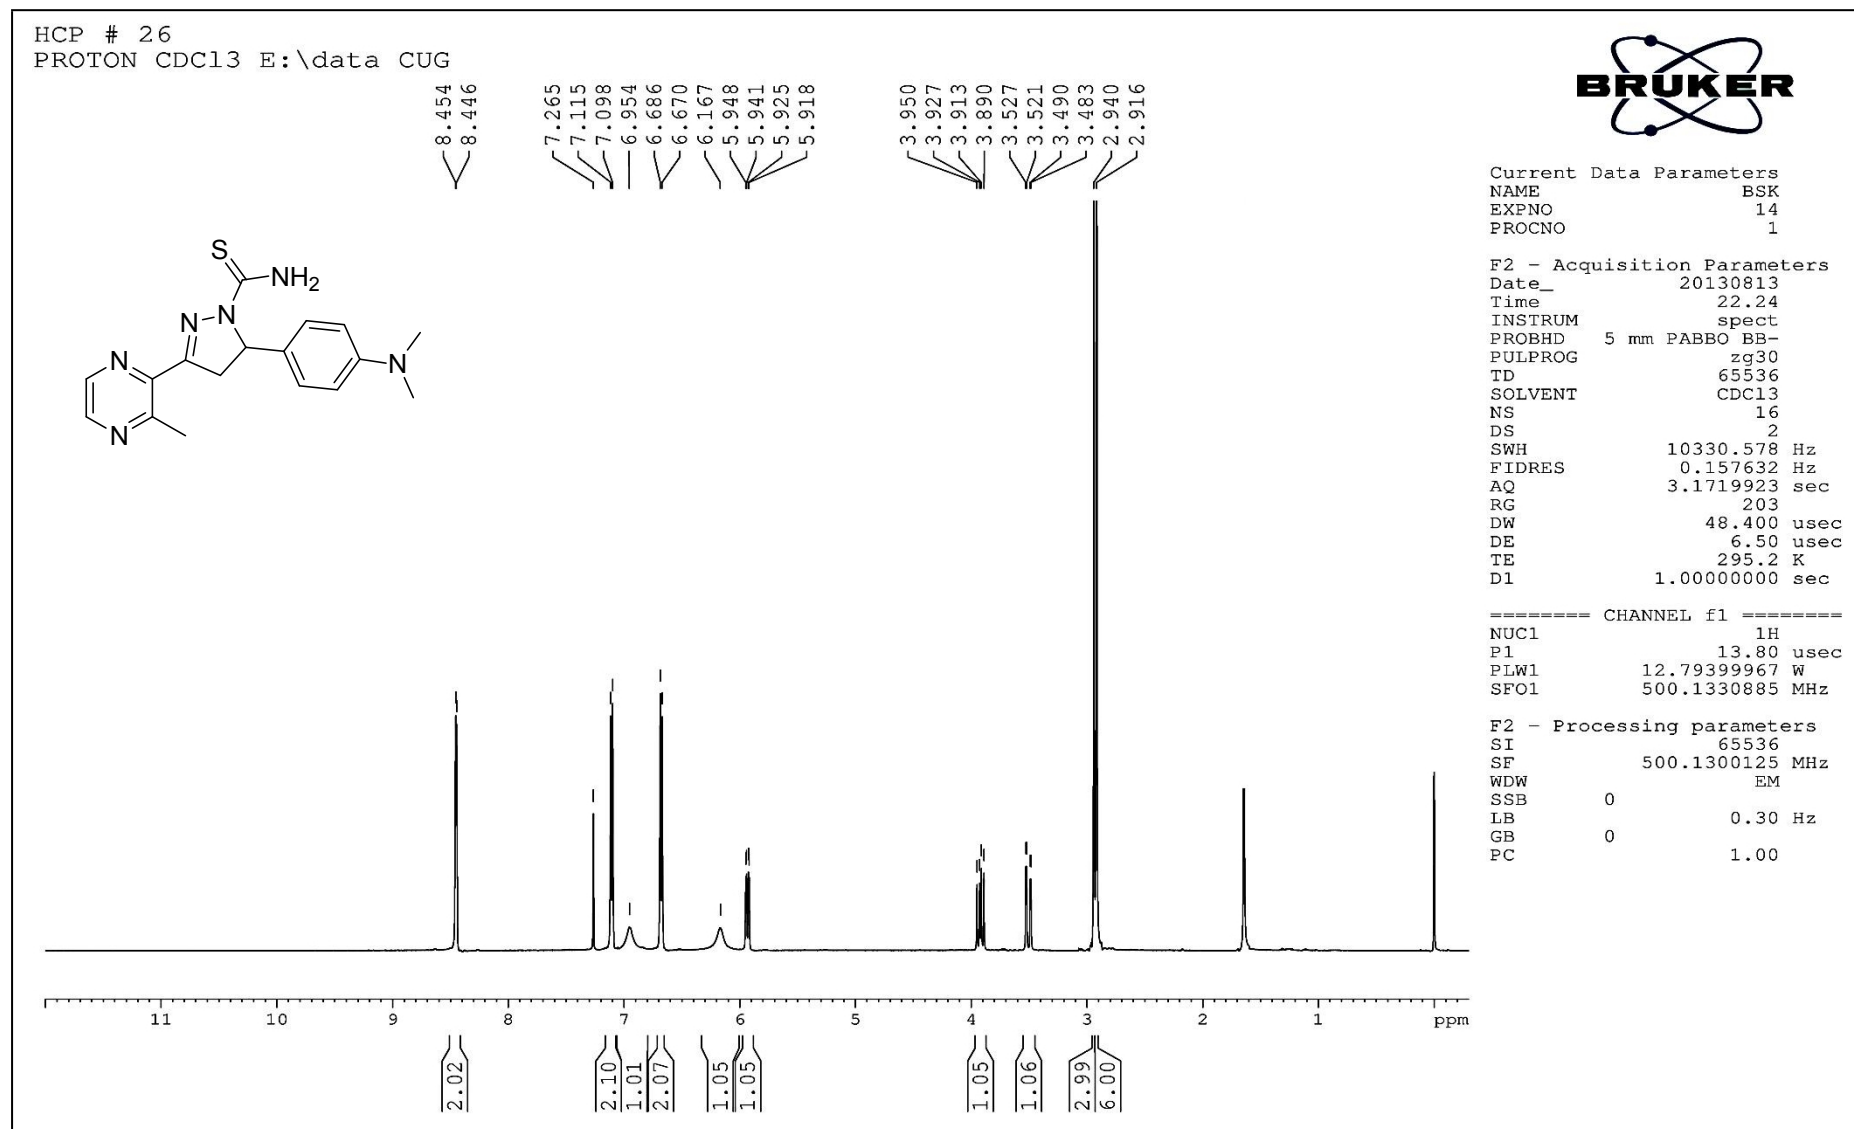

Figure S18: <sup>13</sup>C NMR spectra of 4i

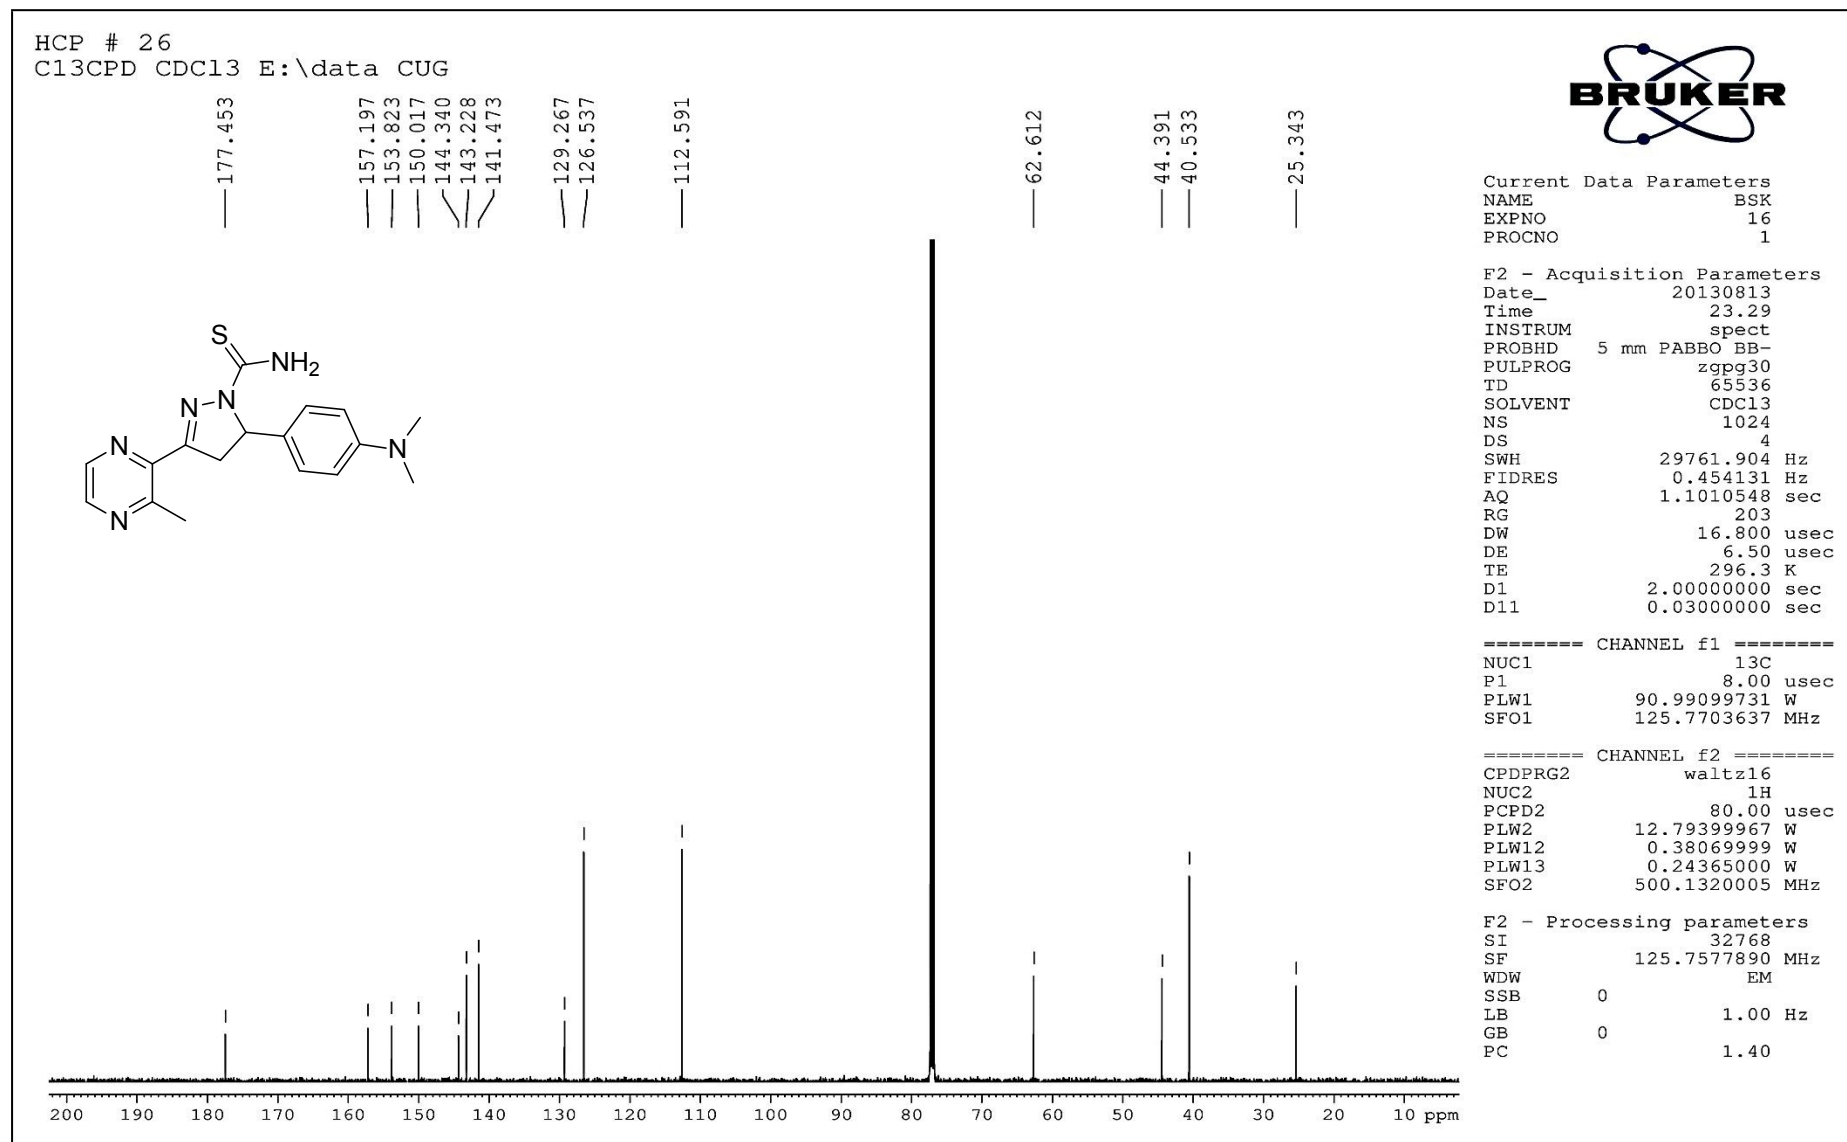

Figure S19: <sup>1</sup>H NMR spectra of 4j

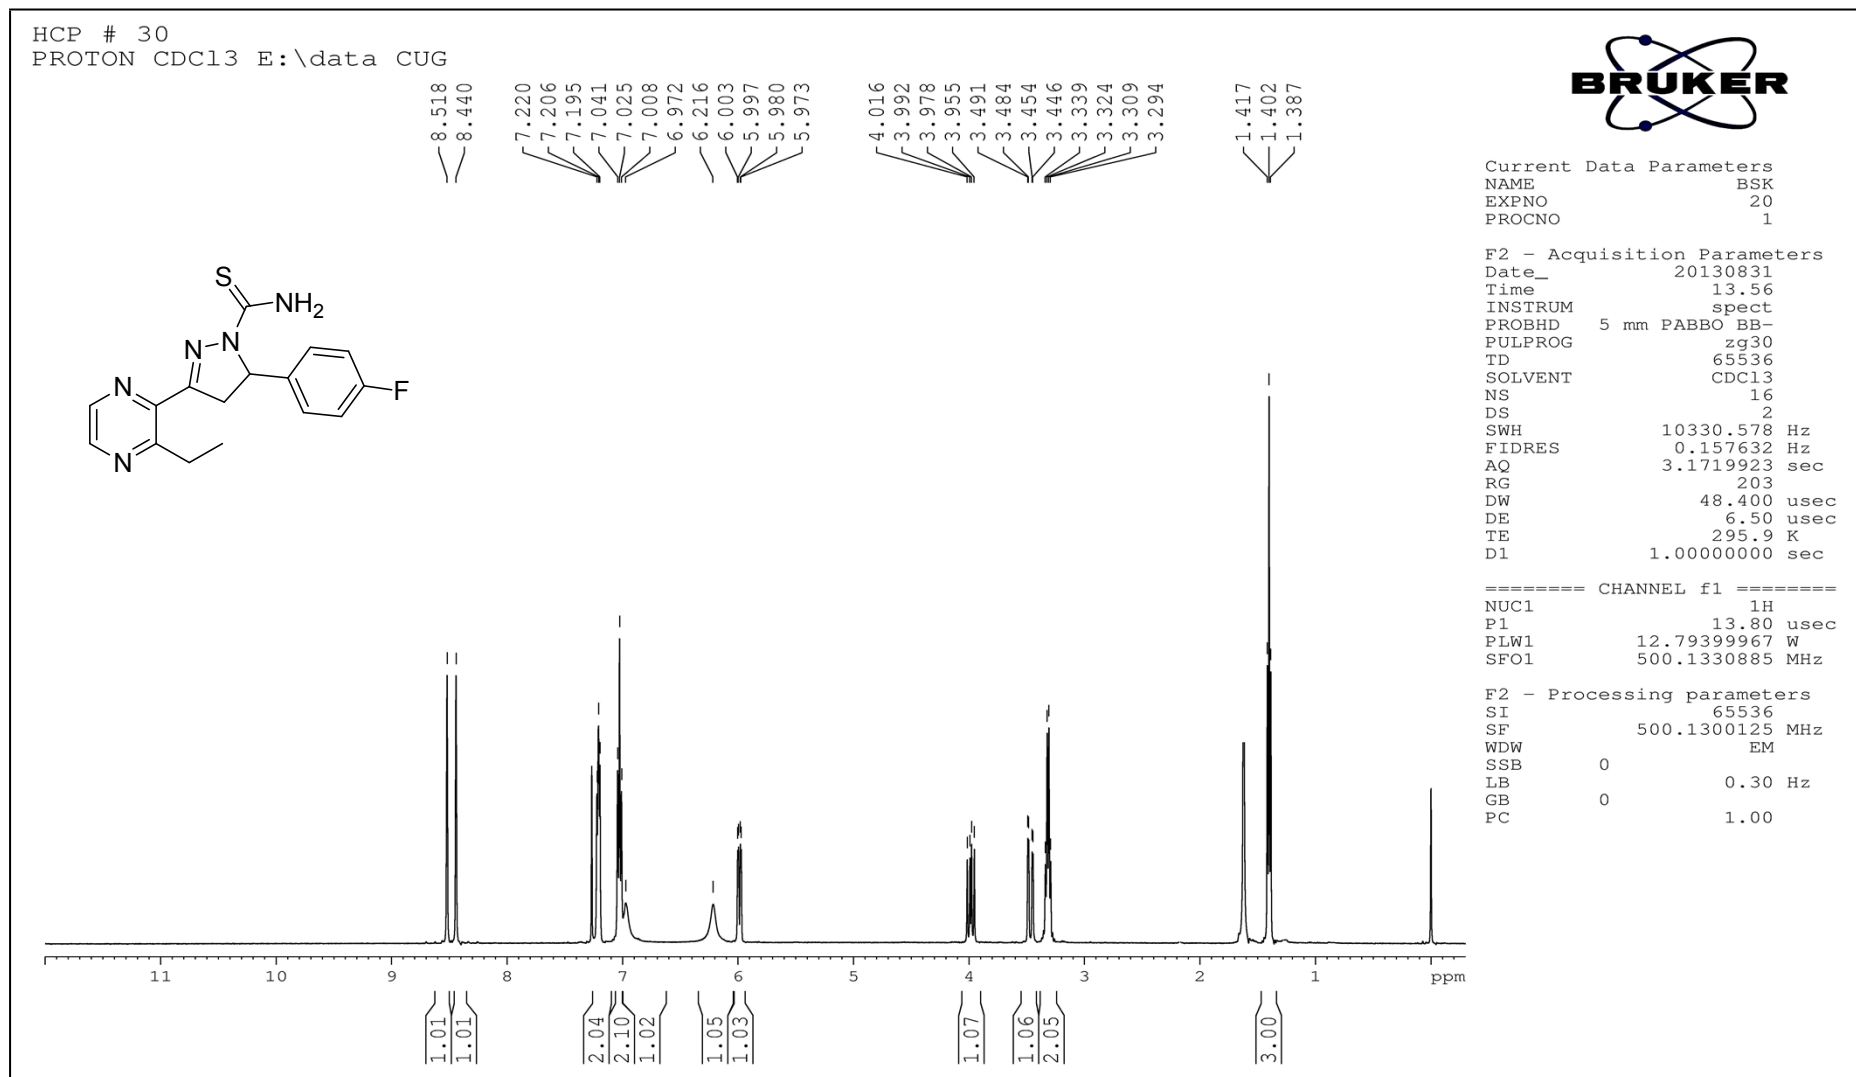



Figure S20: <sup>13</sup>C NMR spectra of 4j

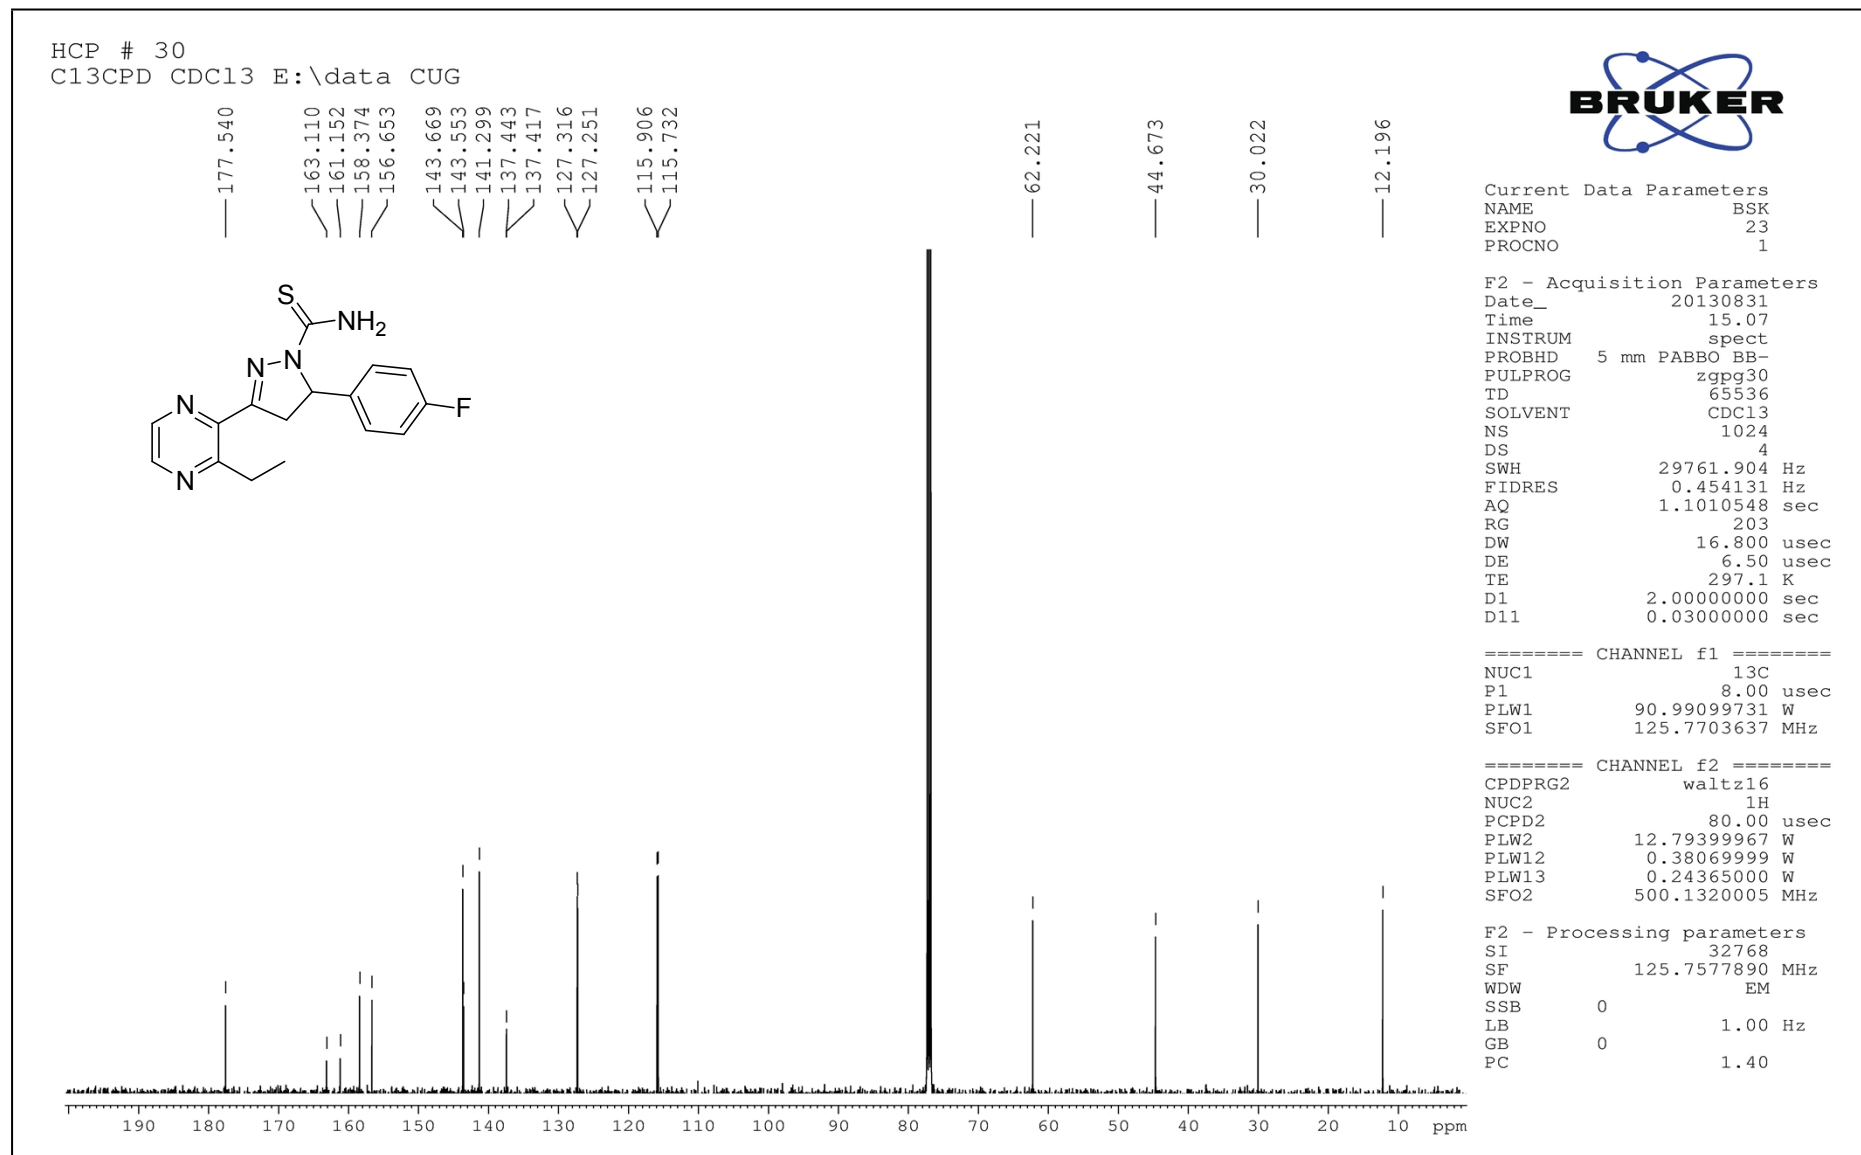

Figure S21: <sup>1</sup>H NMR spectra of 4k

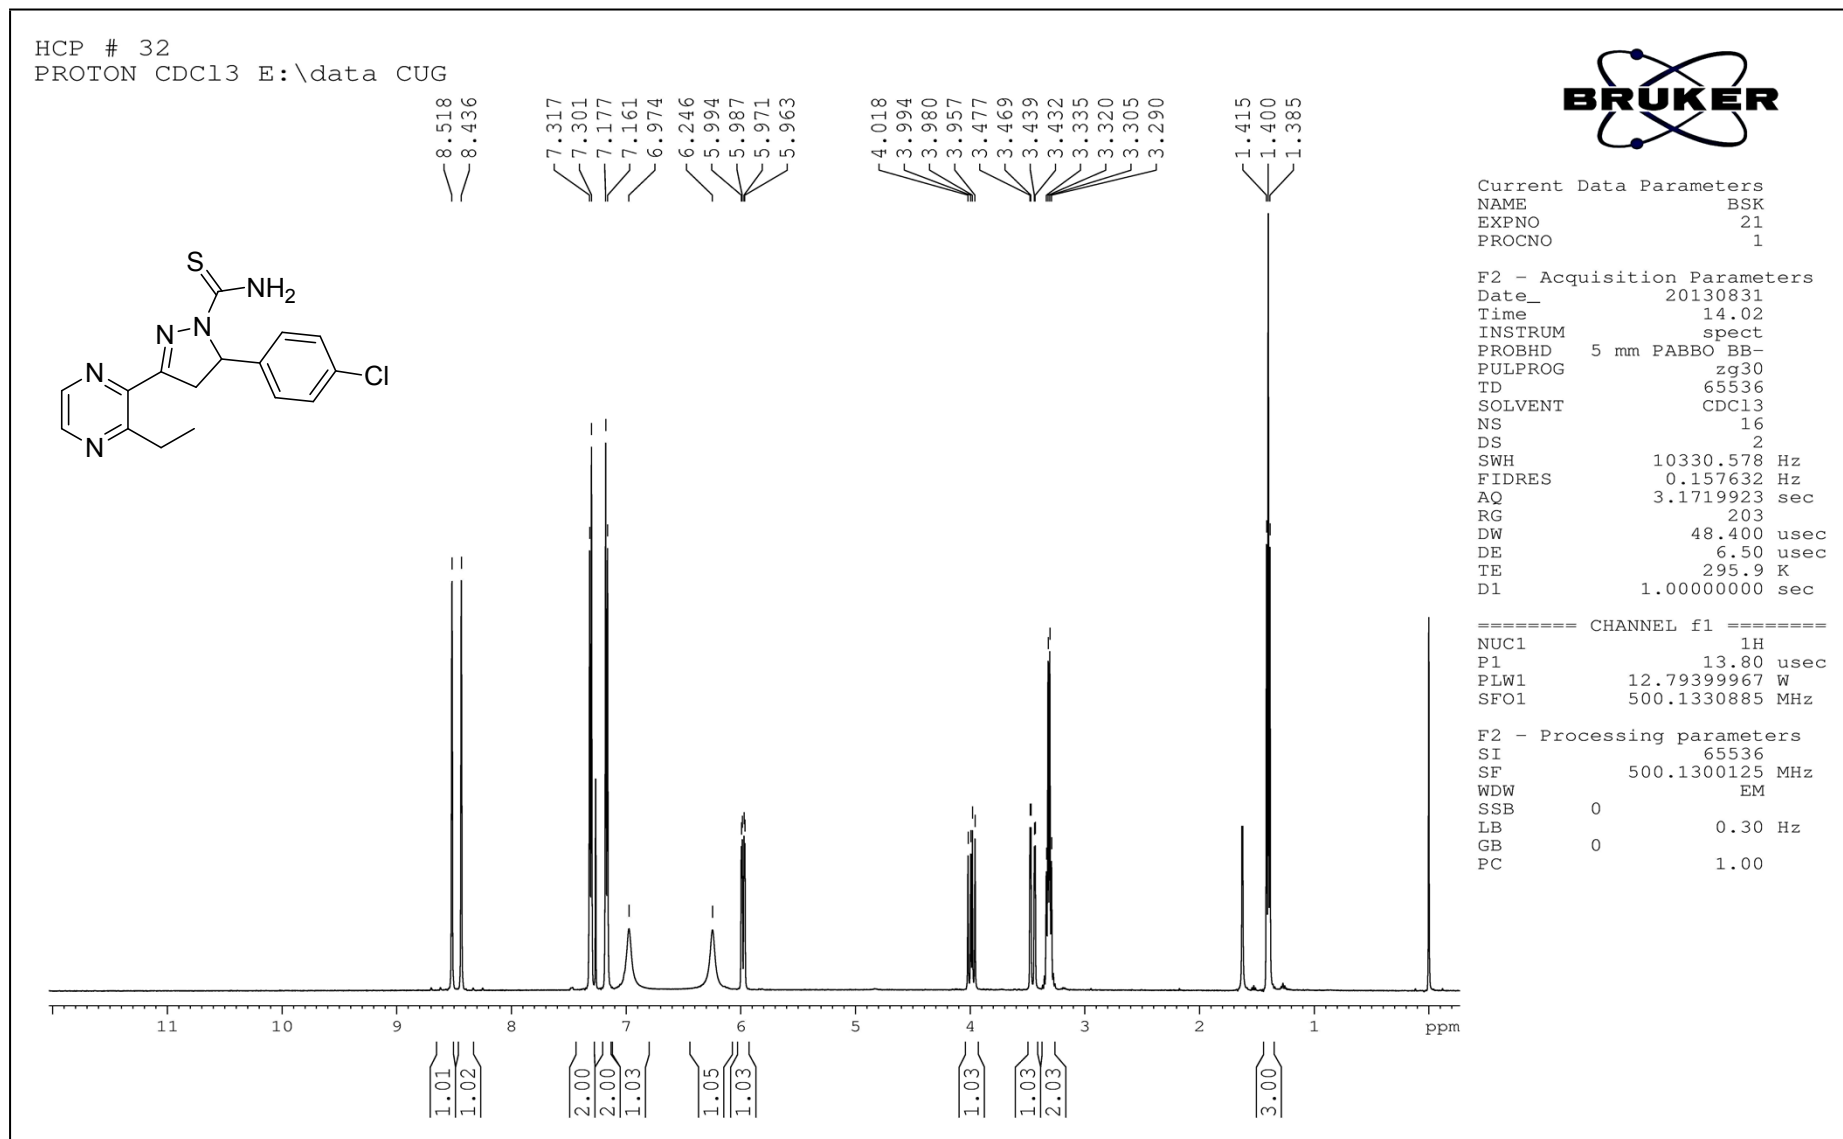

Figure S22: <sup>13</sup>C NMR spectra of 4k

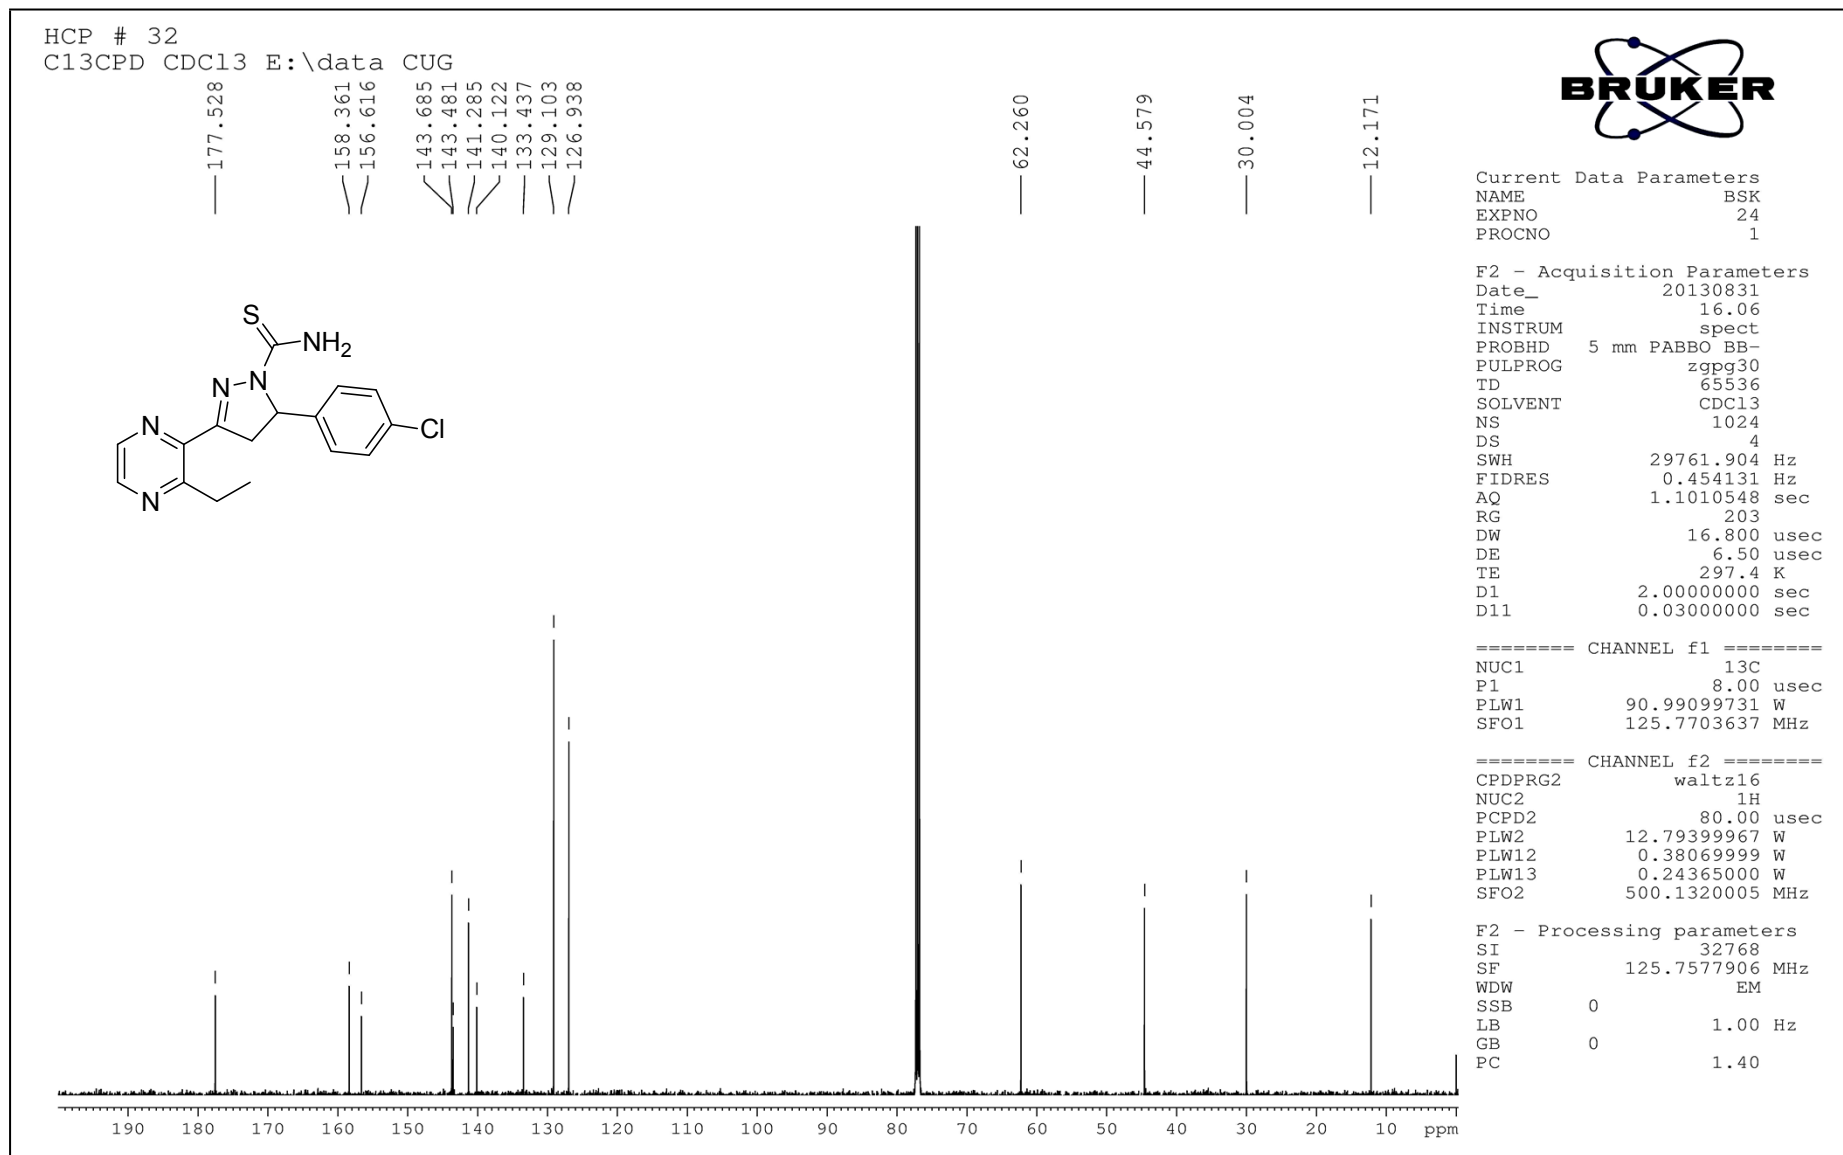

Figure S23: <sup>1</sup>H NMR spectra of 4l

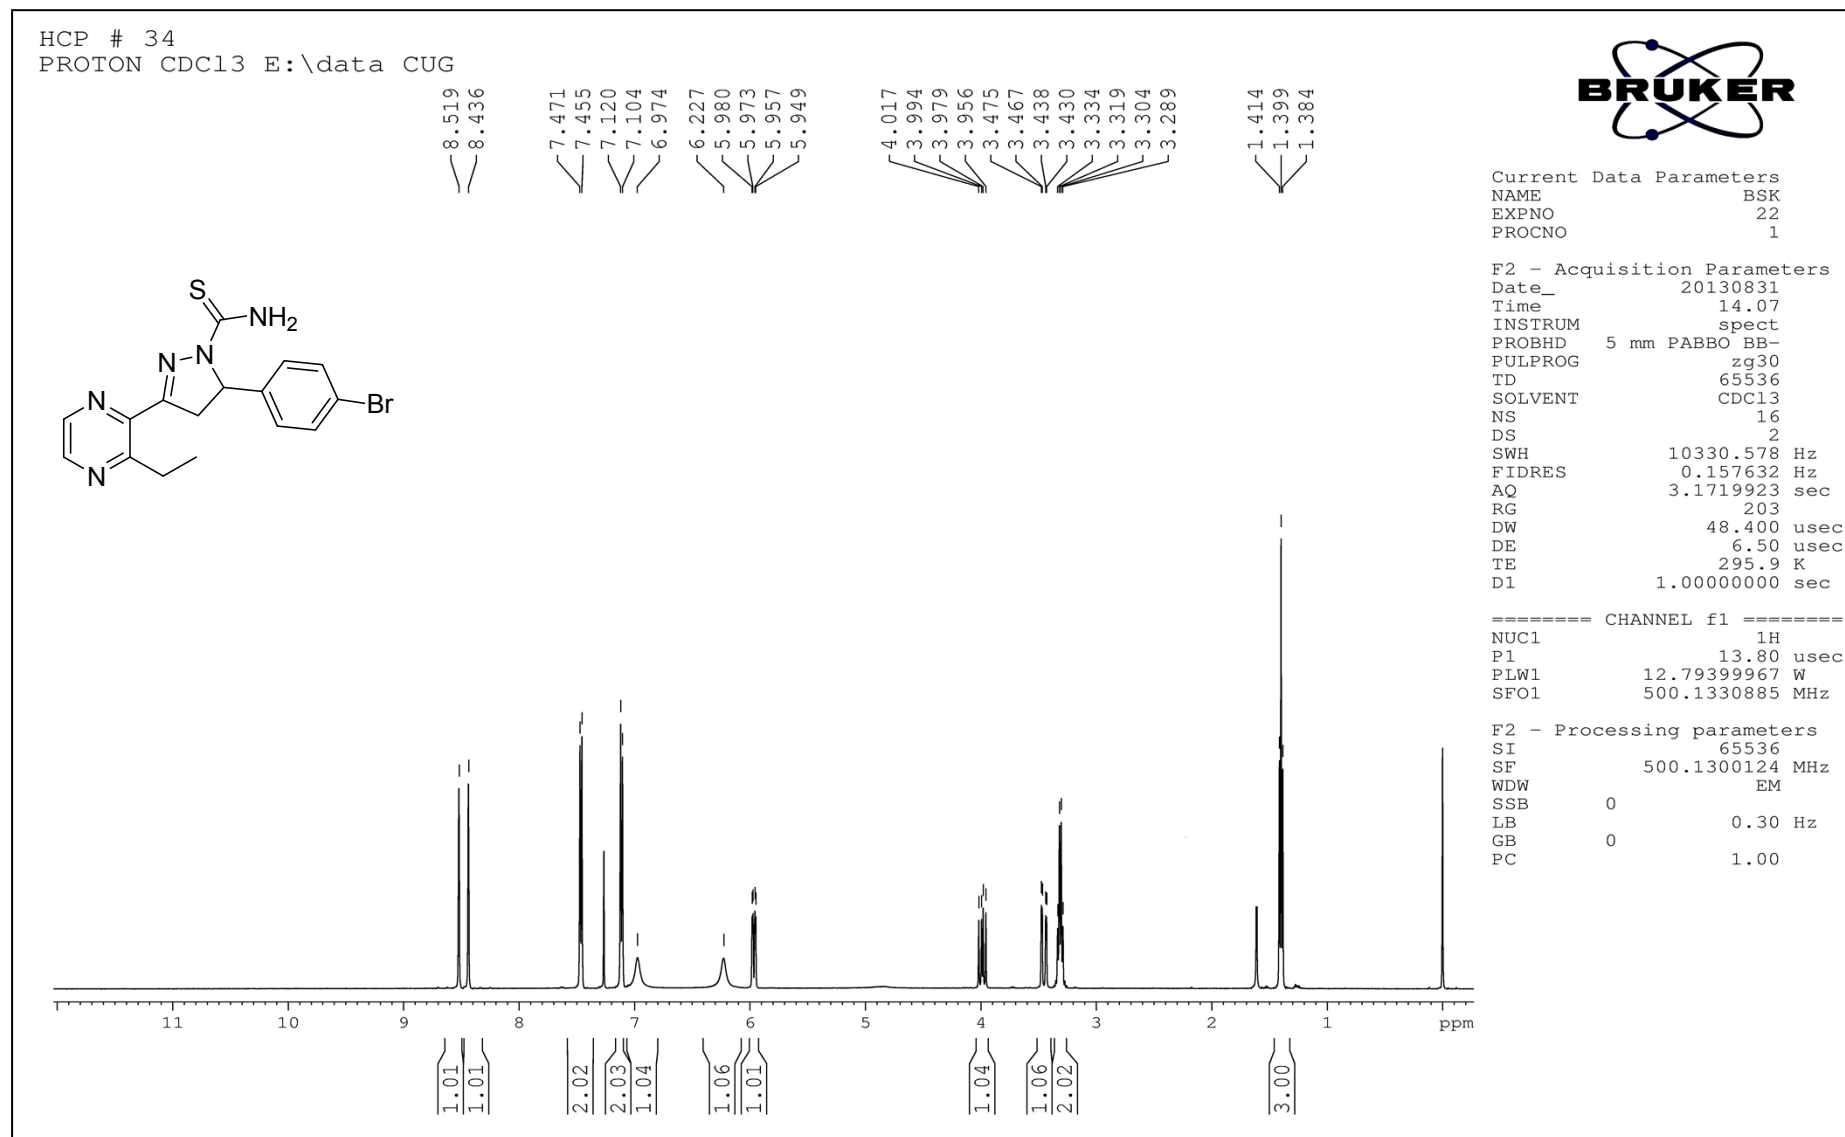

Figure S24: <sup>13</sup>C NMR spectra of 4l

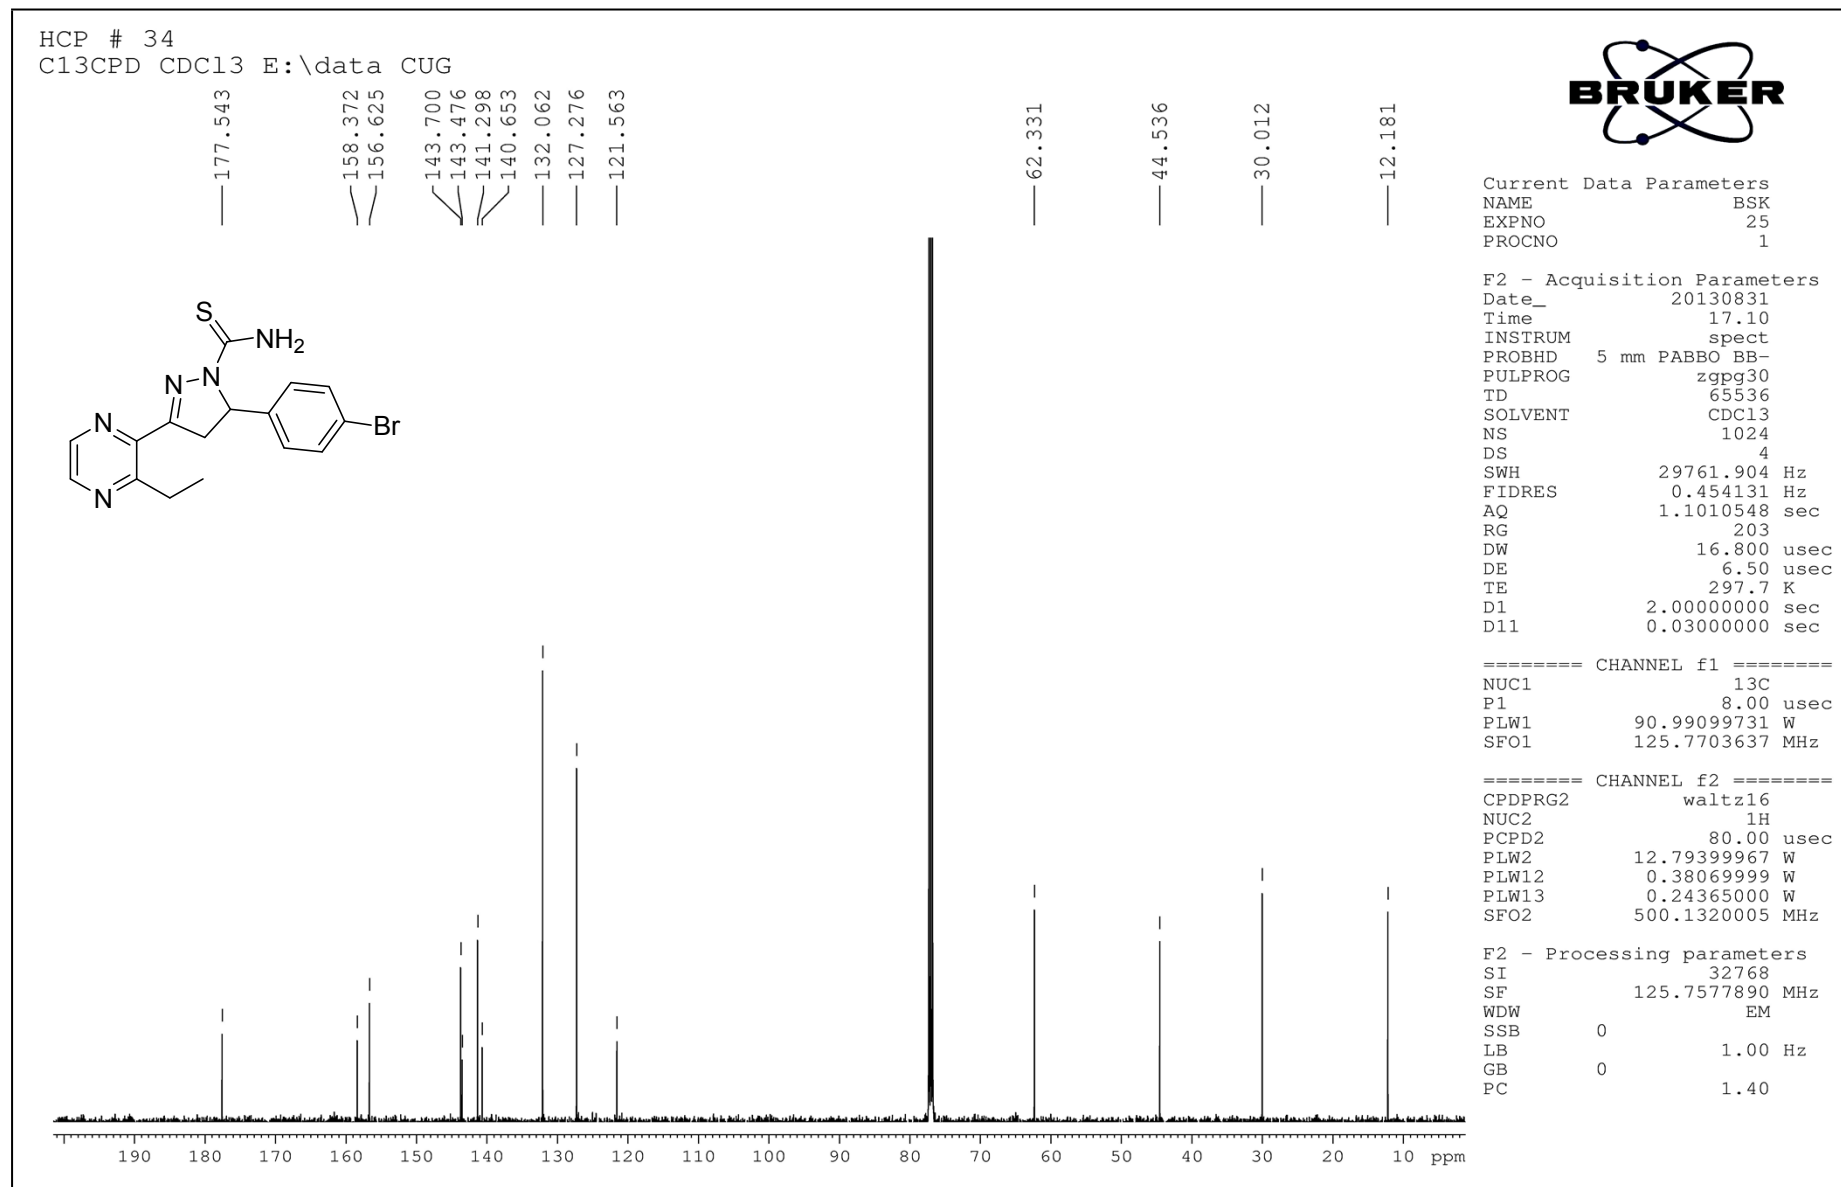

Supplement: c4nj00594e1.pdf [file c4nj00594e1.pdf]
